# Supplementary material for: Phylogeny of Rhynchium and Its Related Genera (Hymenoptera: Eumeninae) Based on Universal Single-Copy Orthologs and Ultraconserved Elements
Source: MDPI journal article supplement (doi:10.3390/insects14090775), 2023-09-20
Supplement: s1 [file s1]

usco50\_partitioning

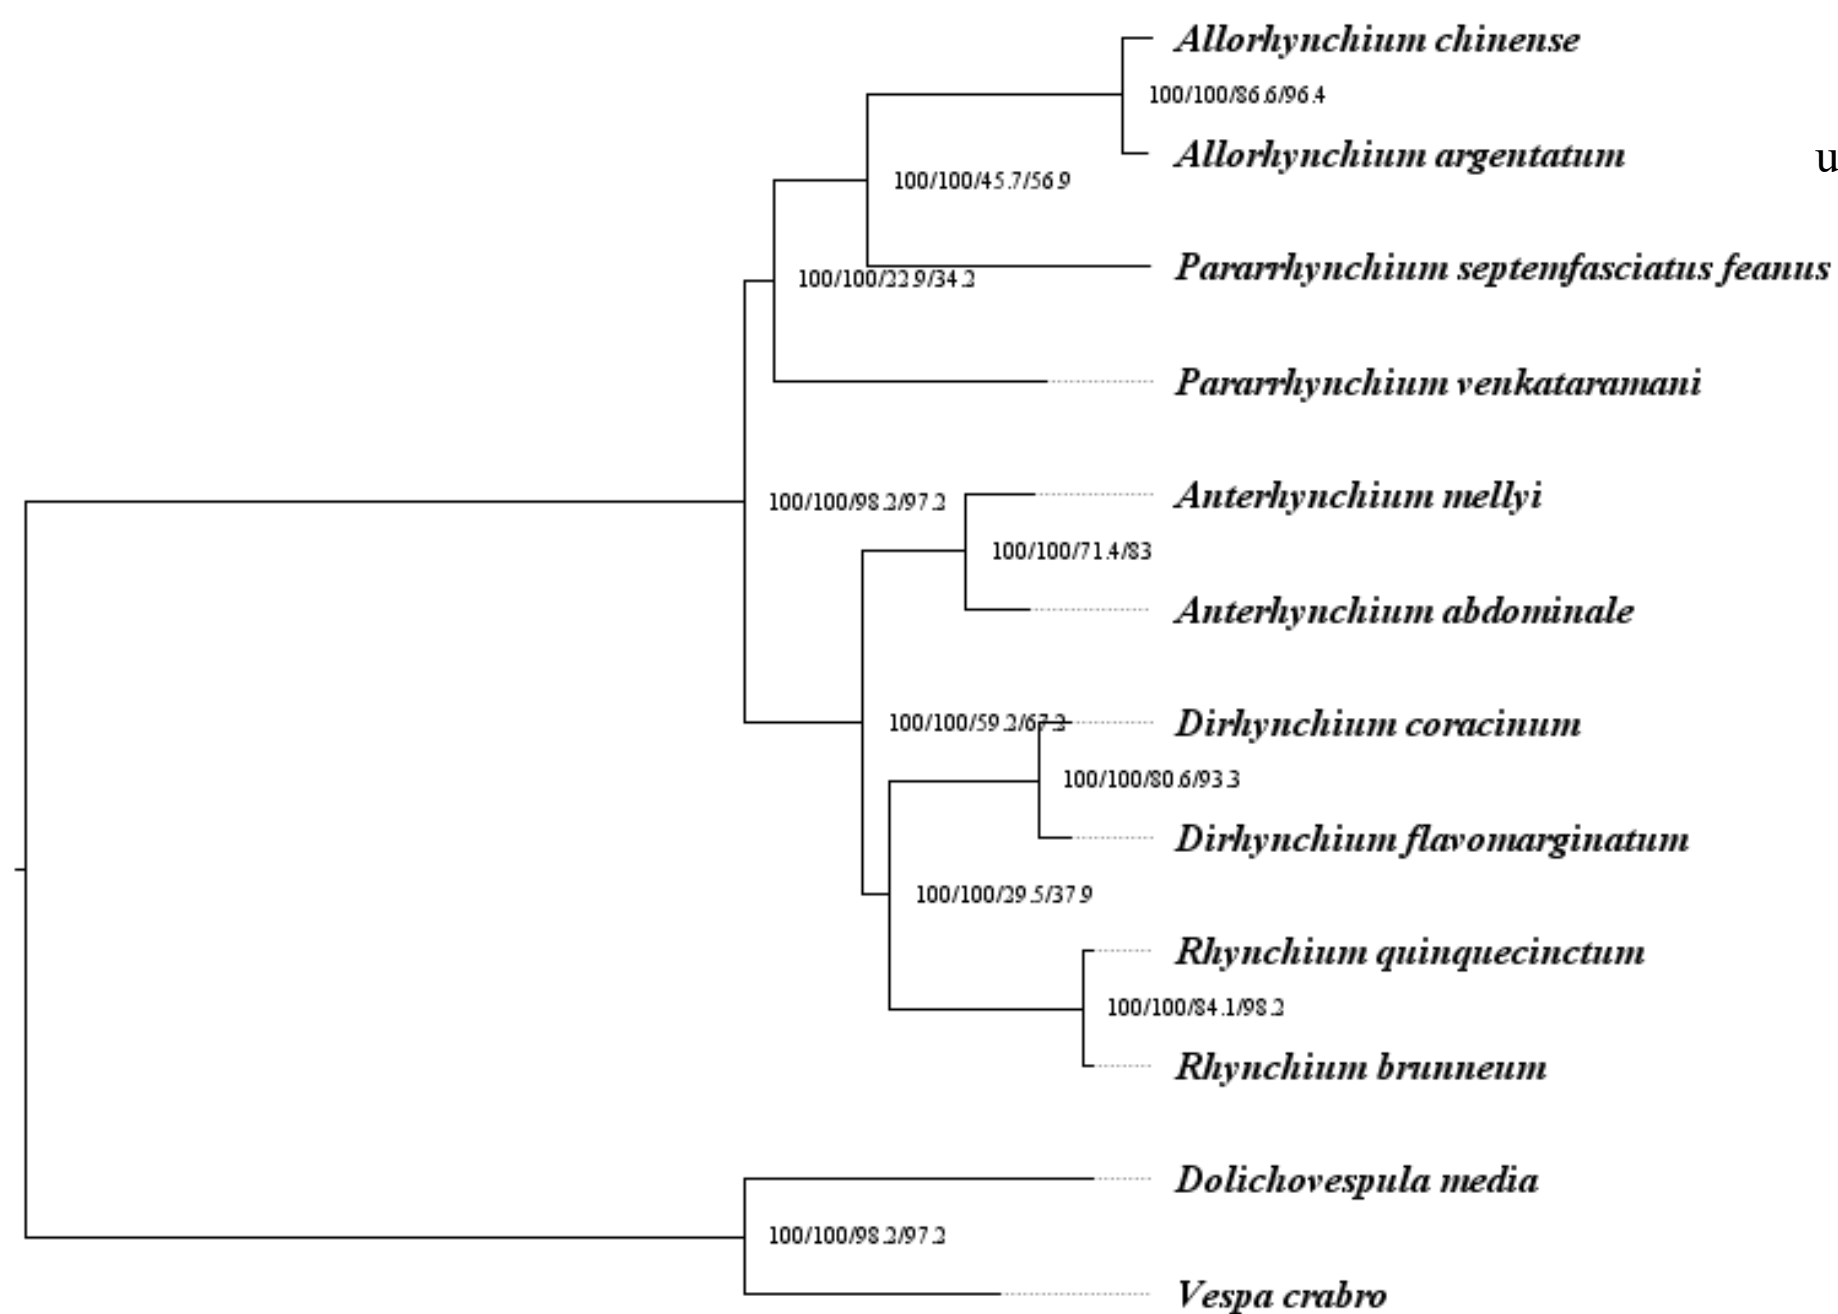

0.02

usco50\_GHOST

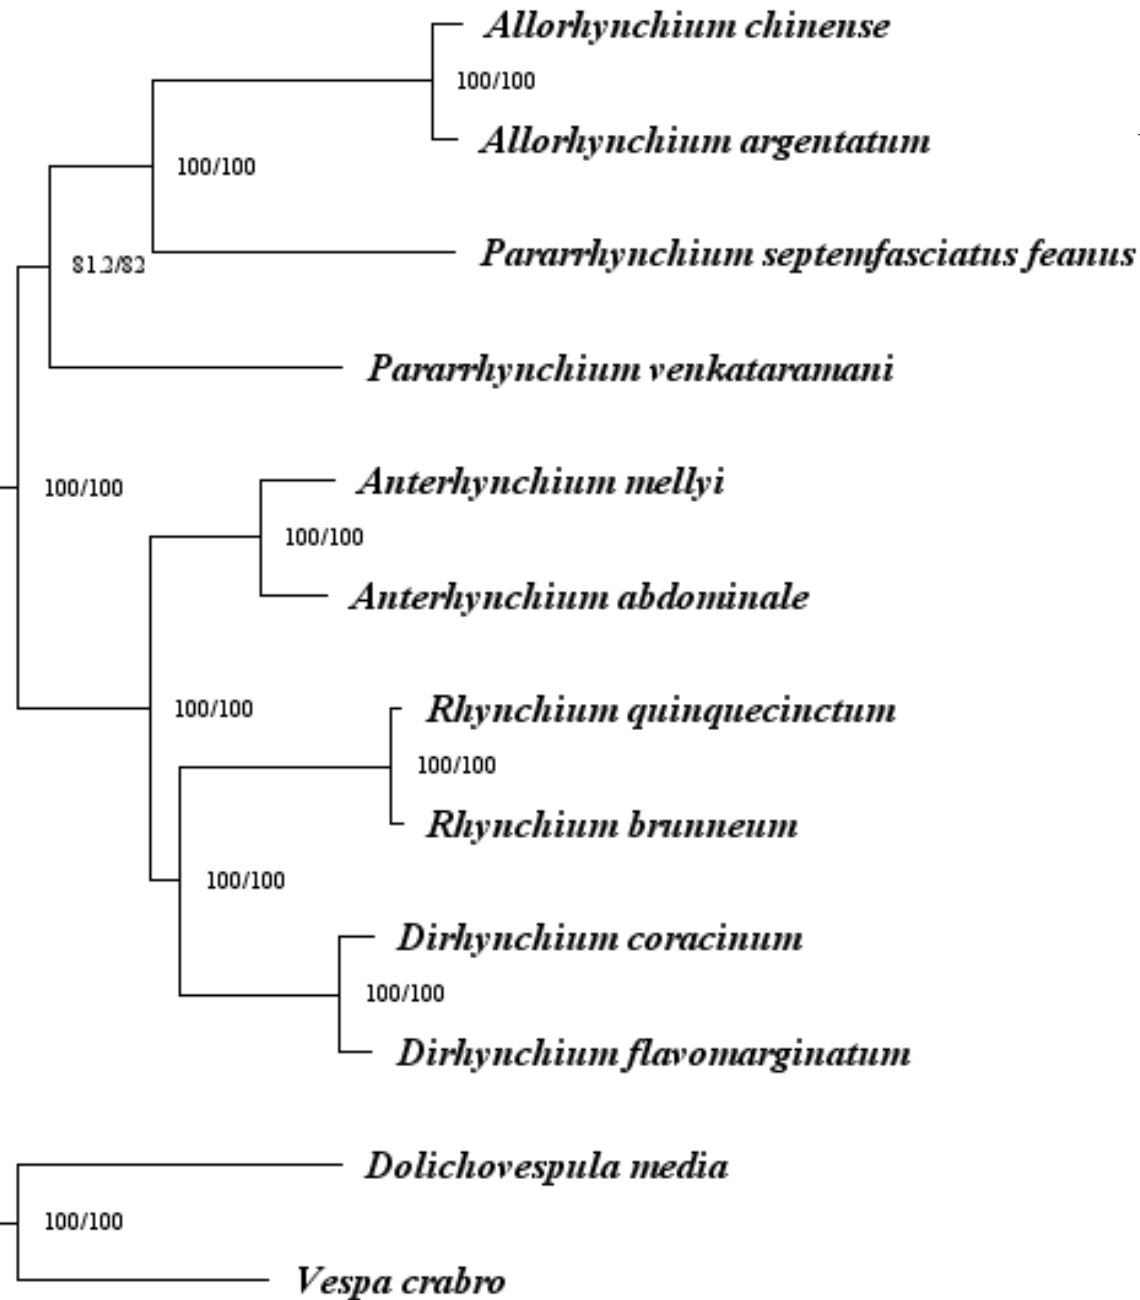

0.02

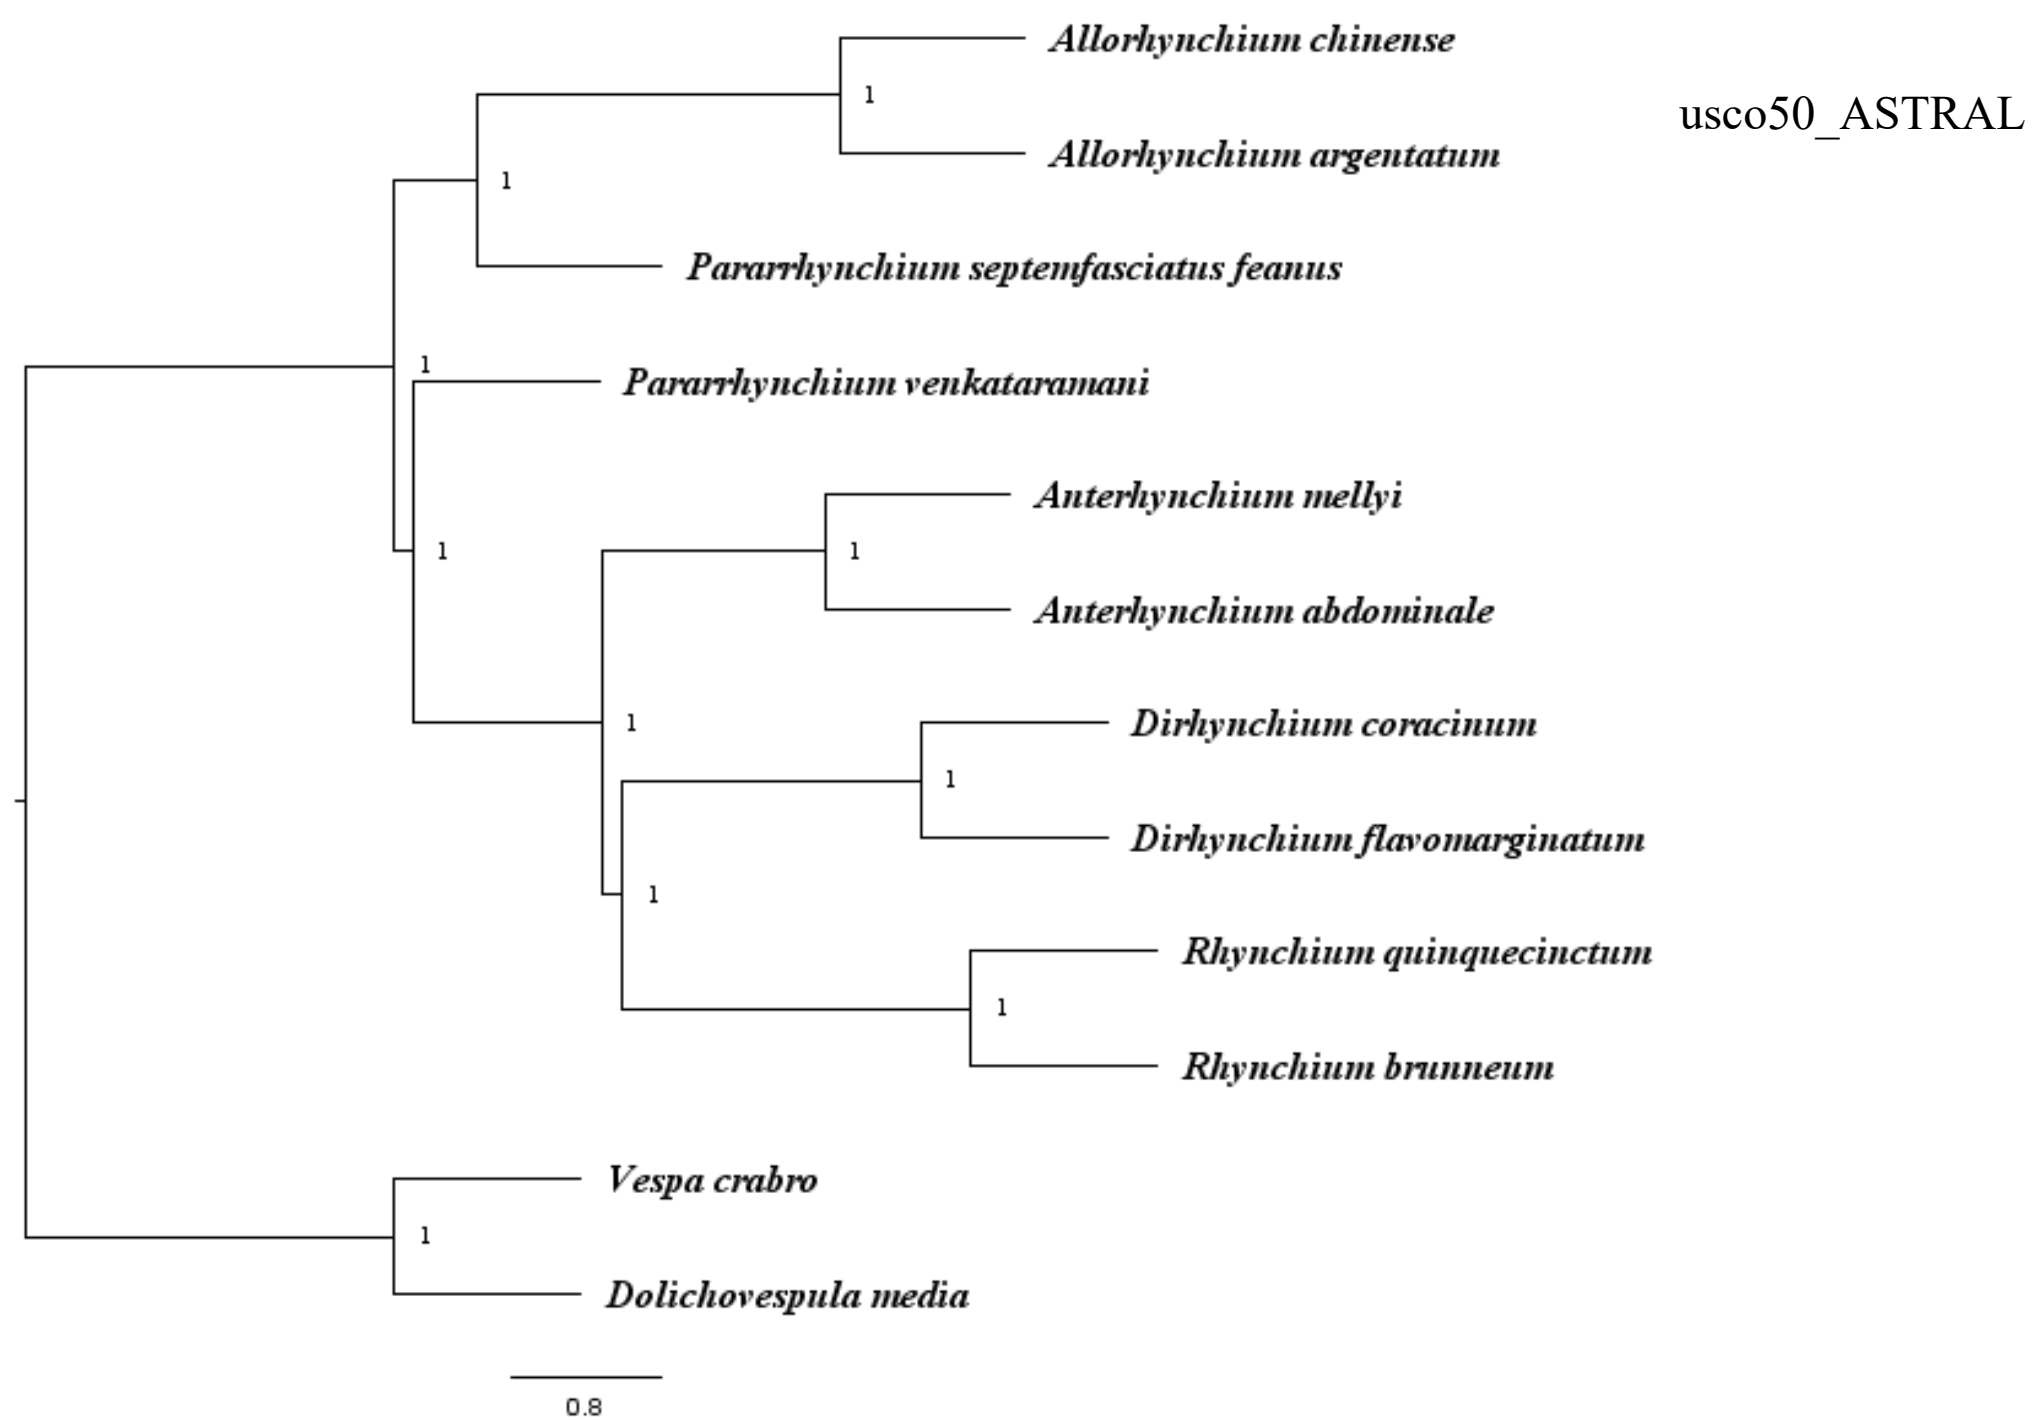

usco50\_PMSF

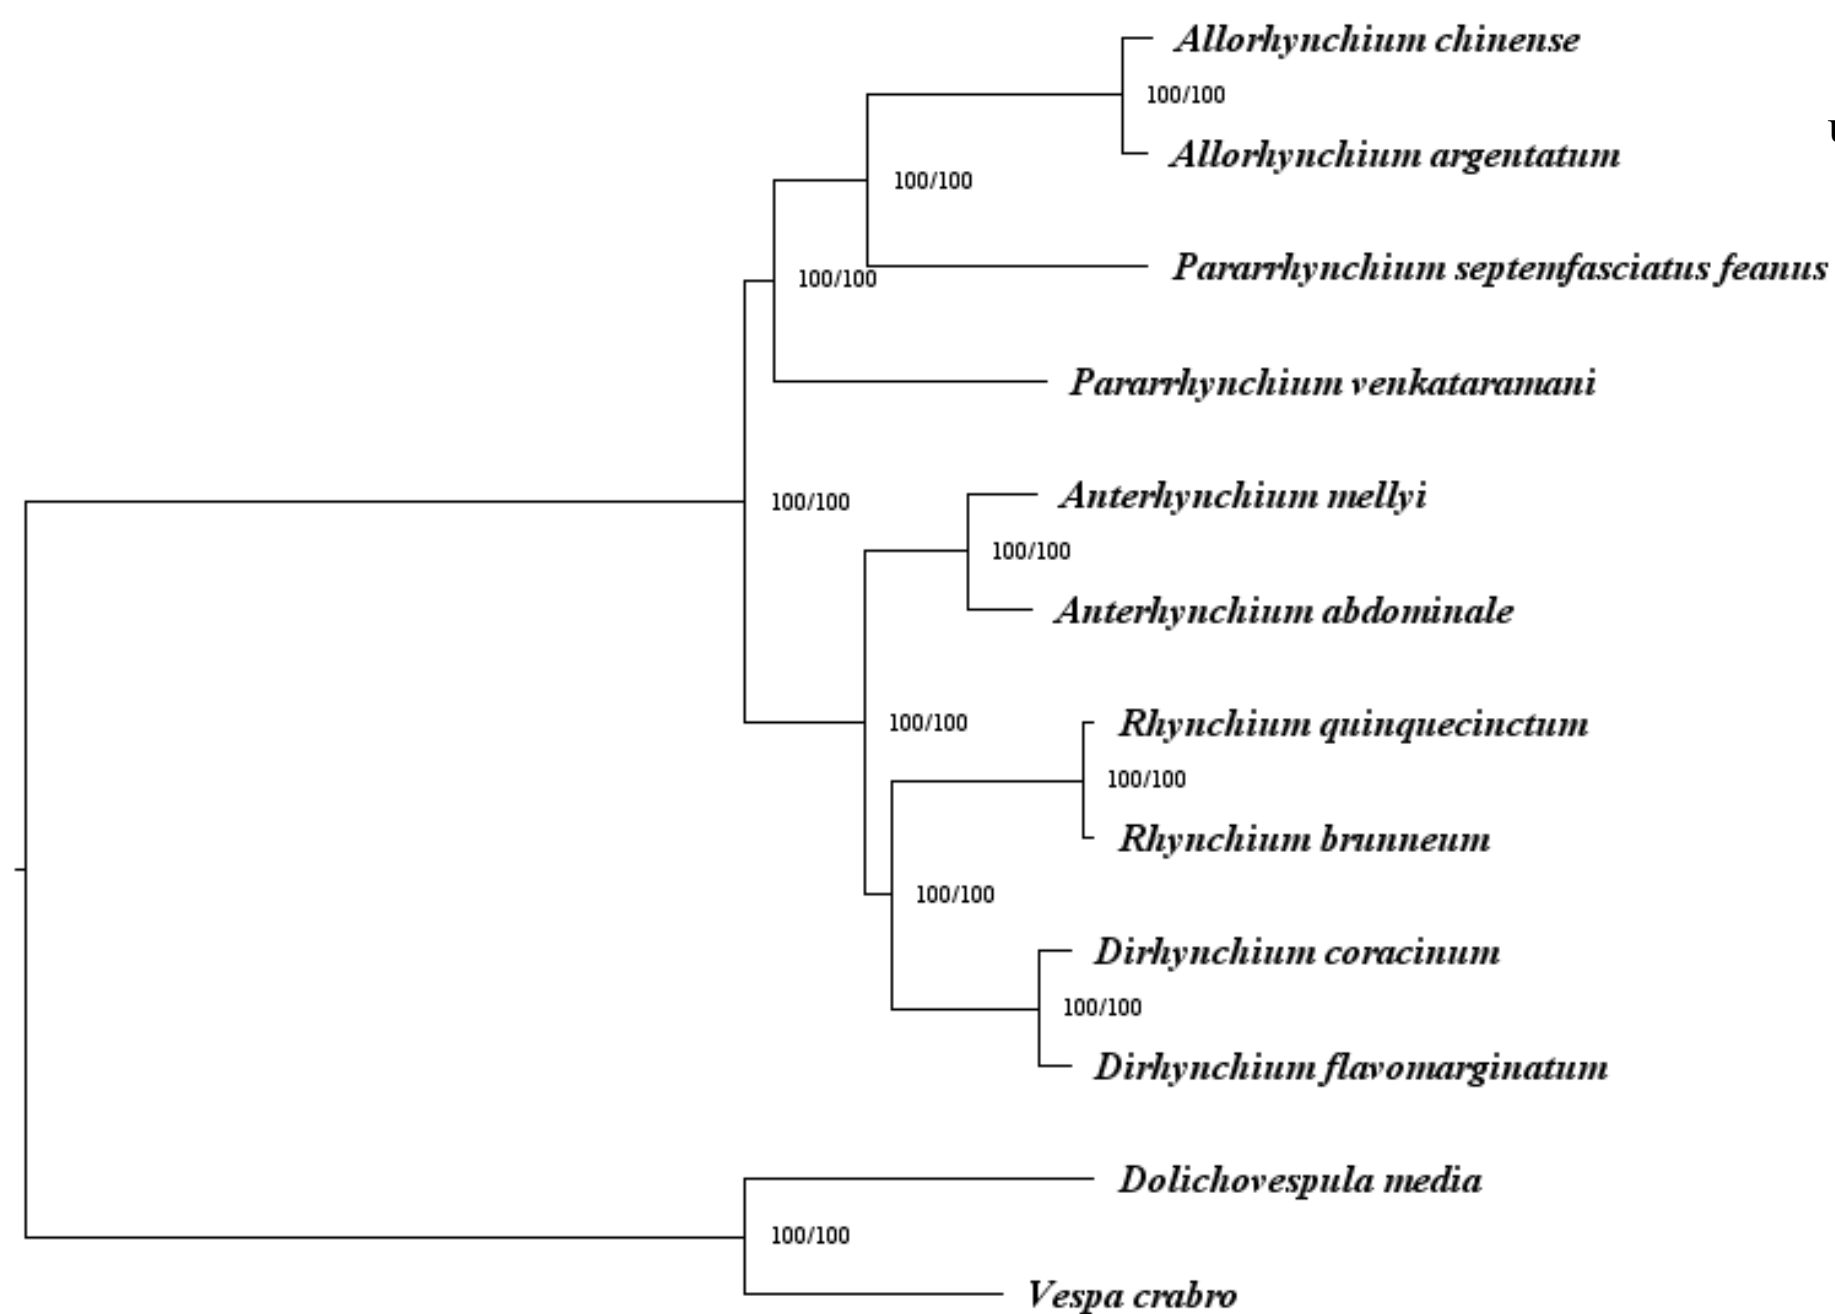

0.01

usco90\_partitioning

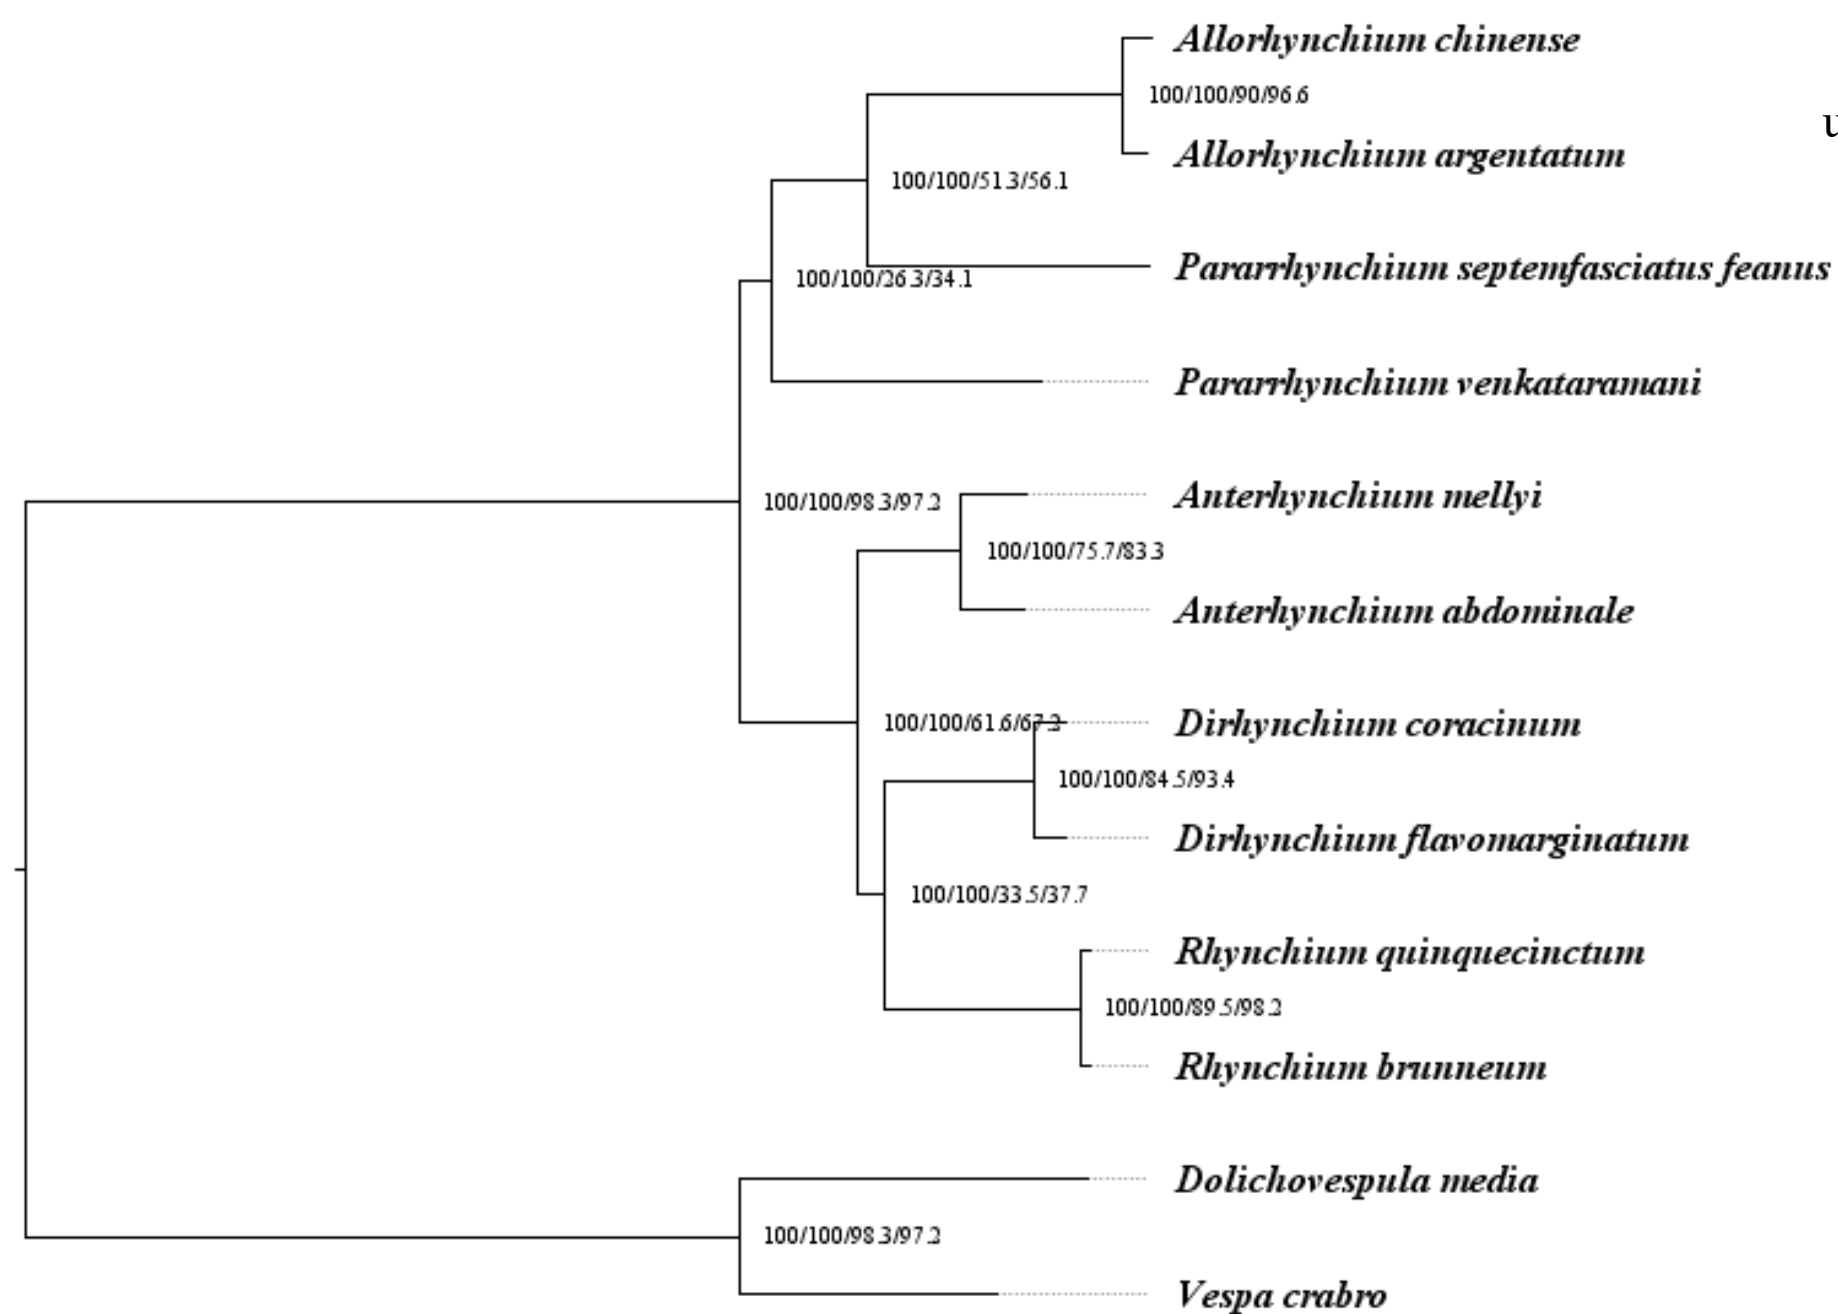

0.02

usco90\_GHOST

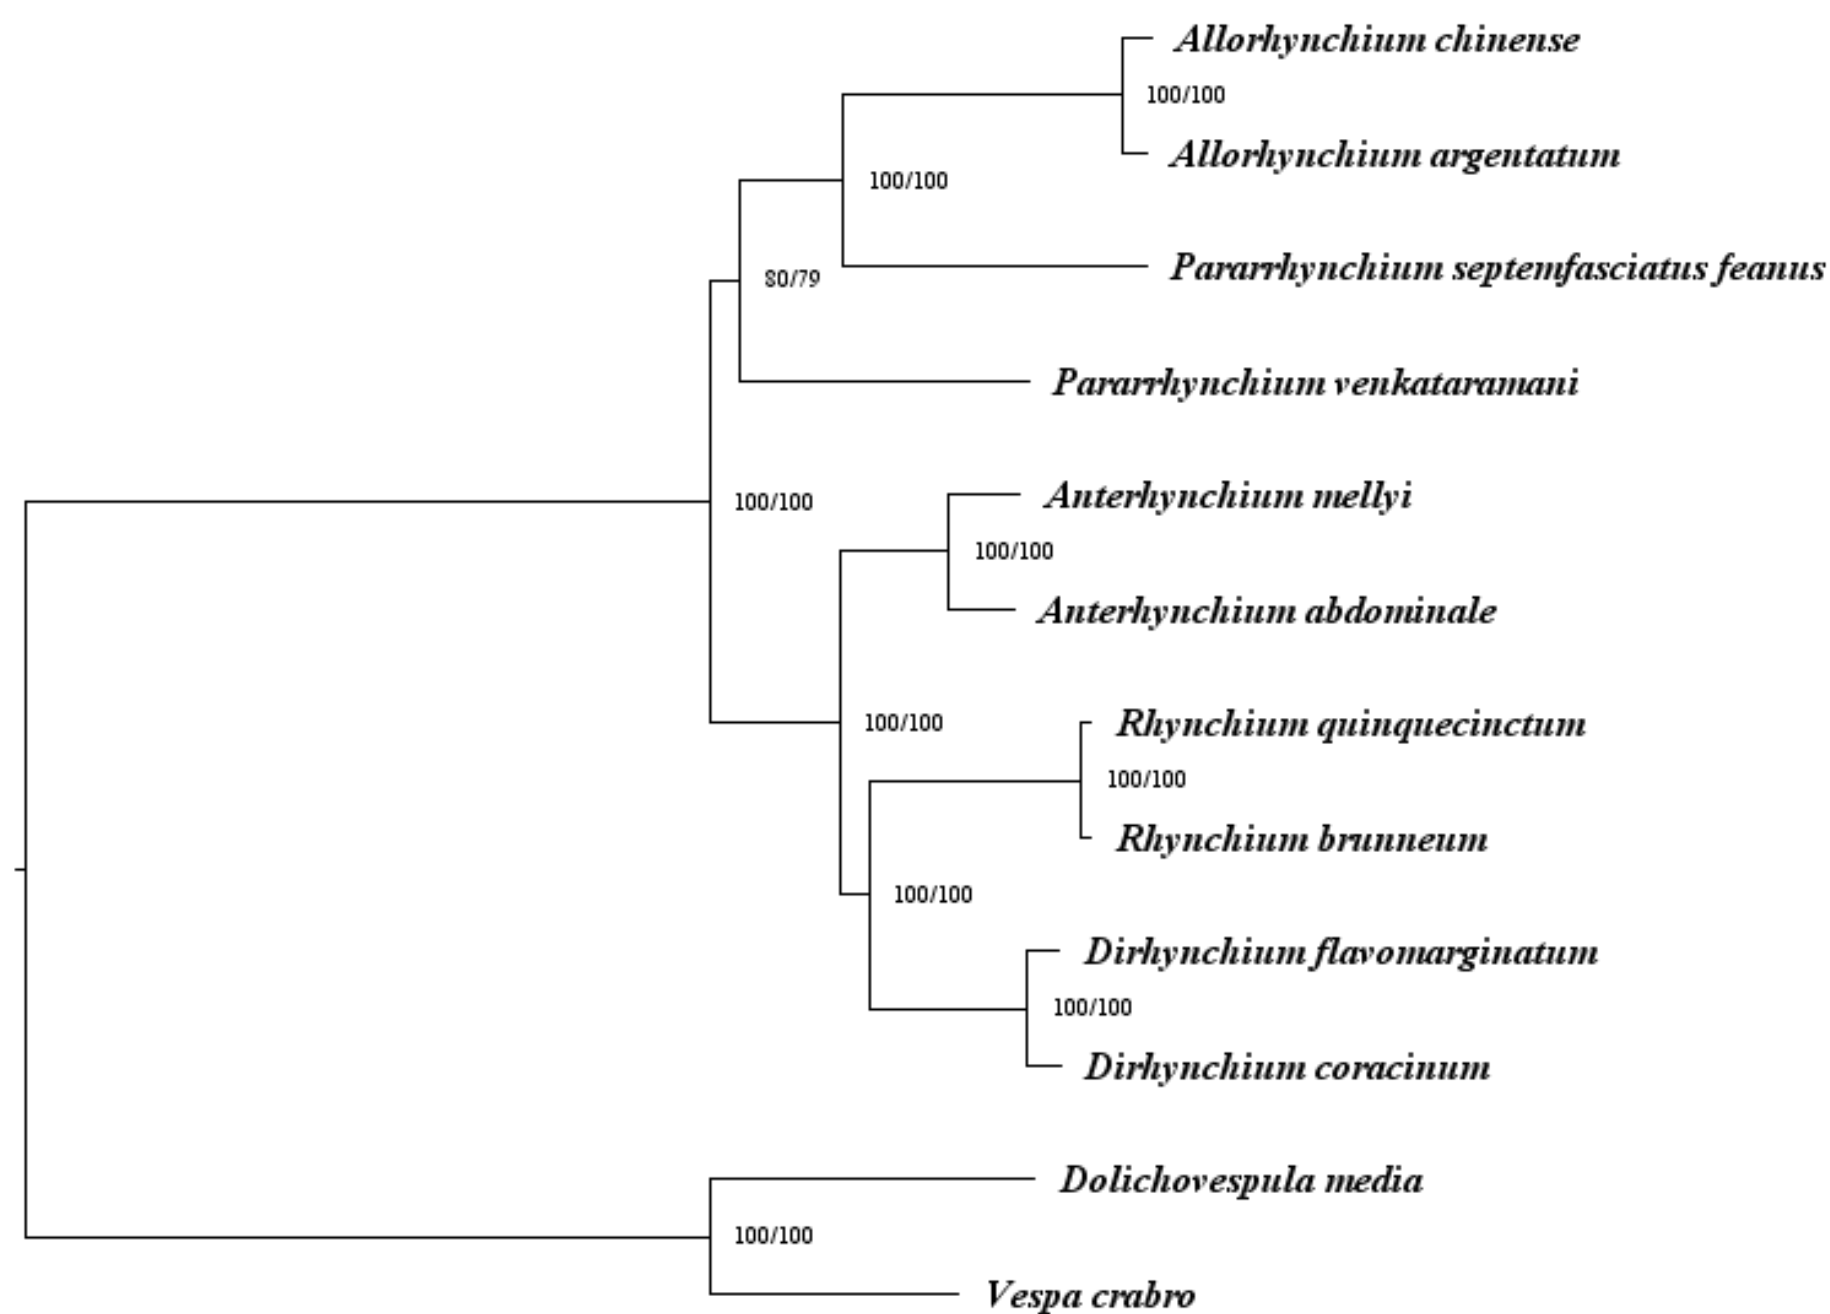

0.02

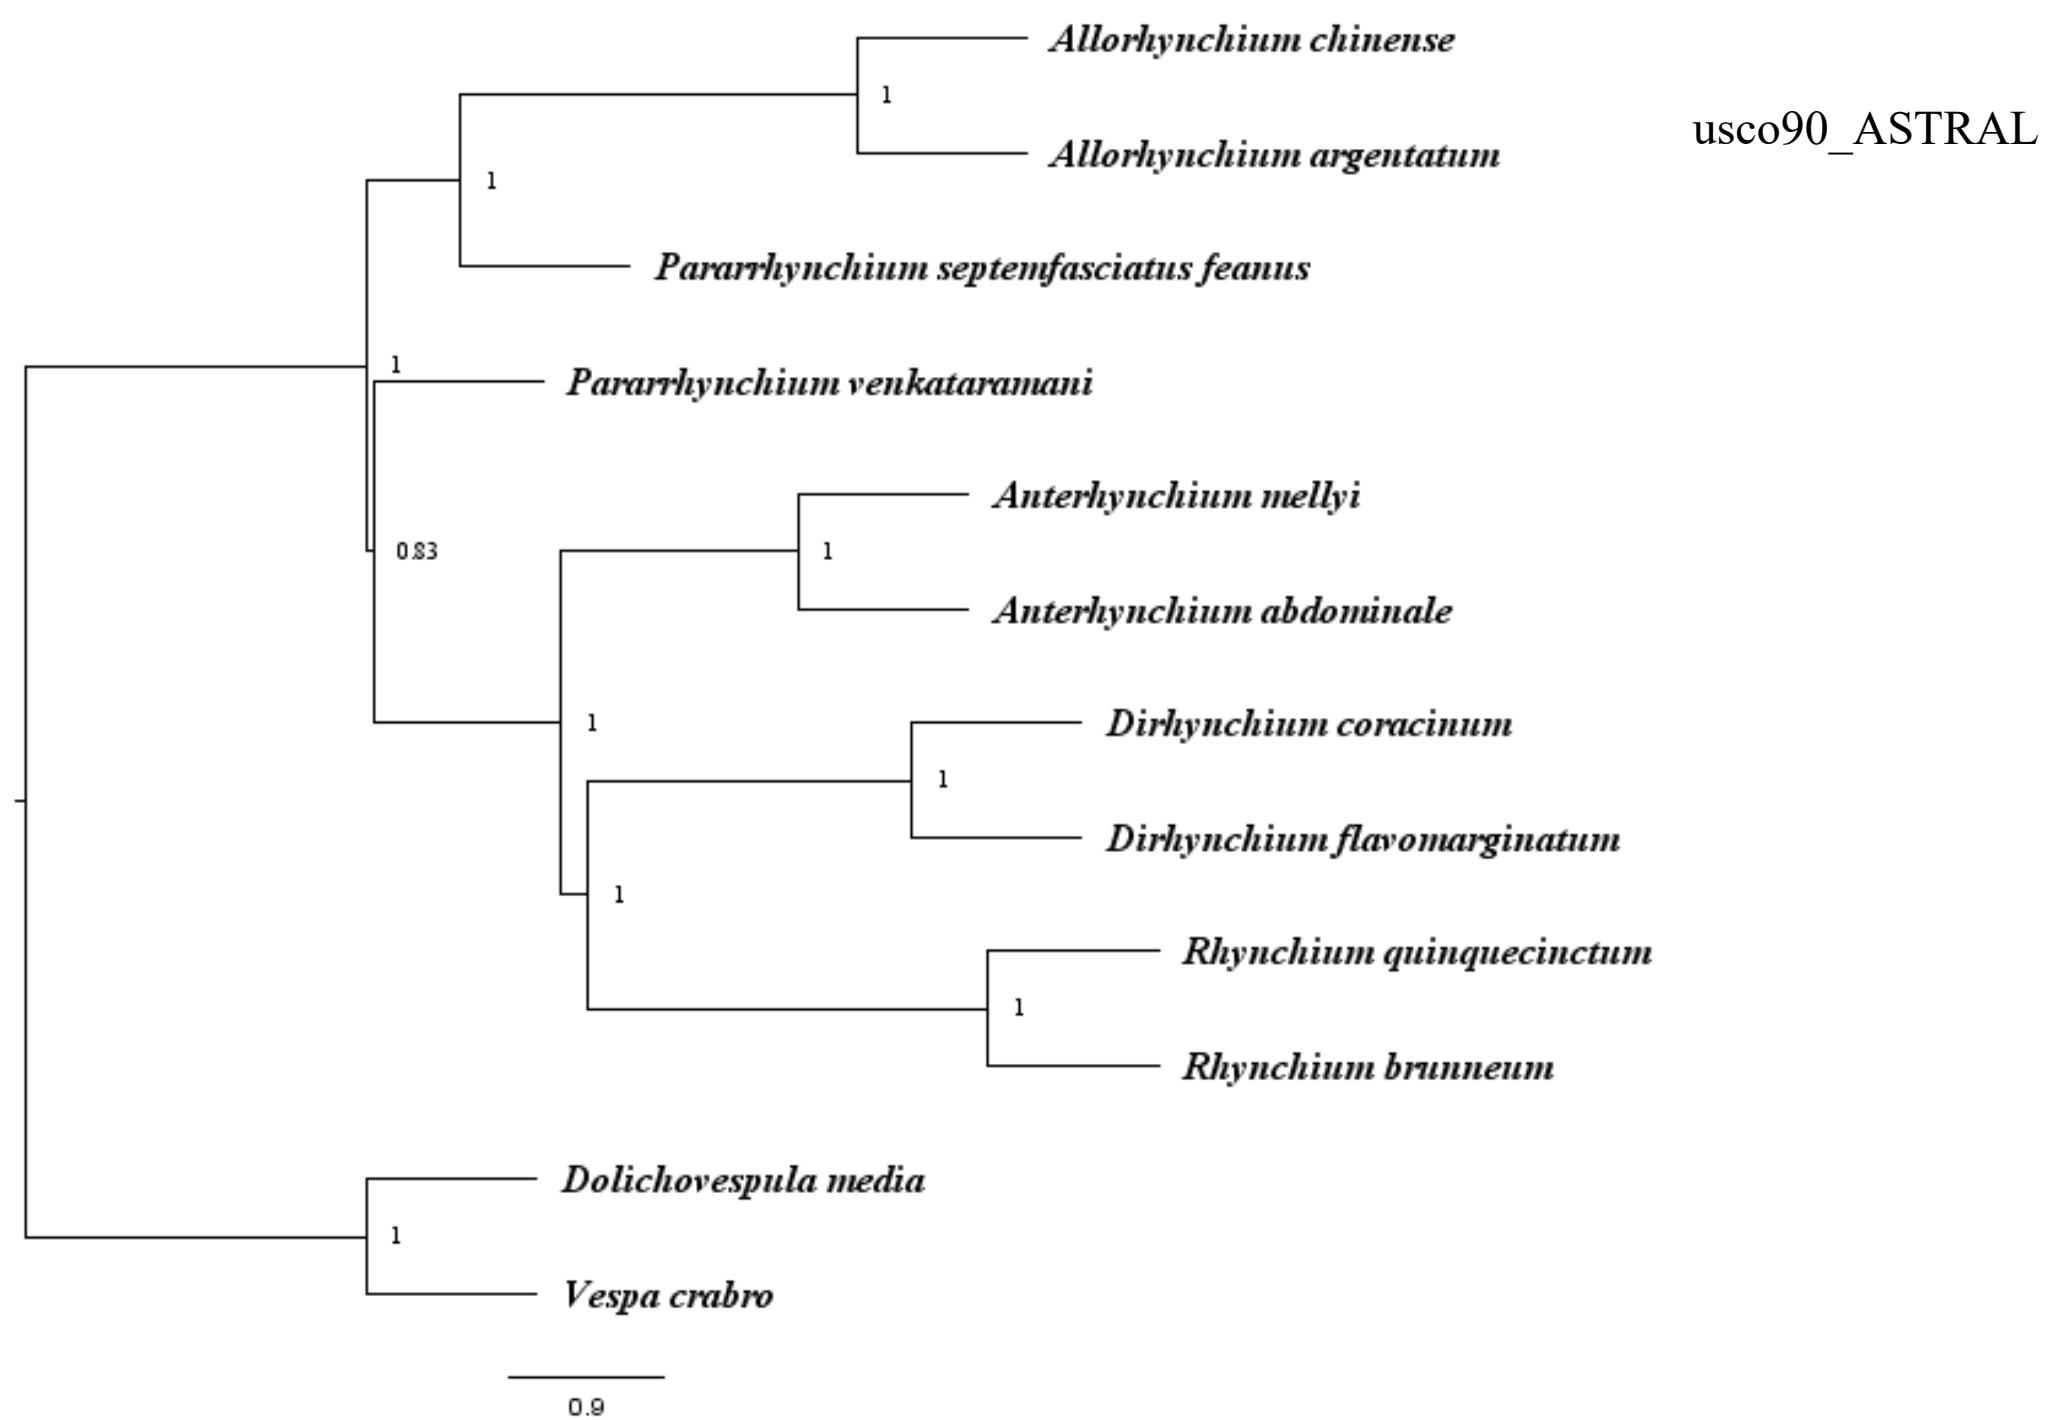

usco90\_PMSF

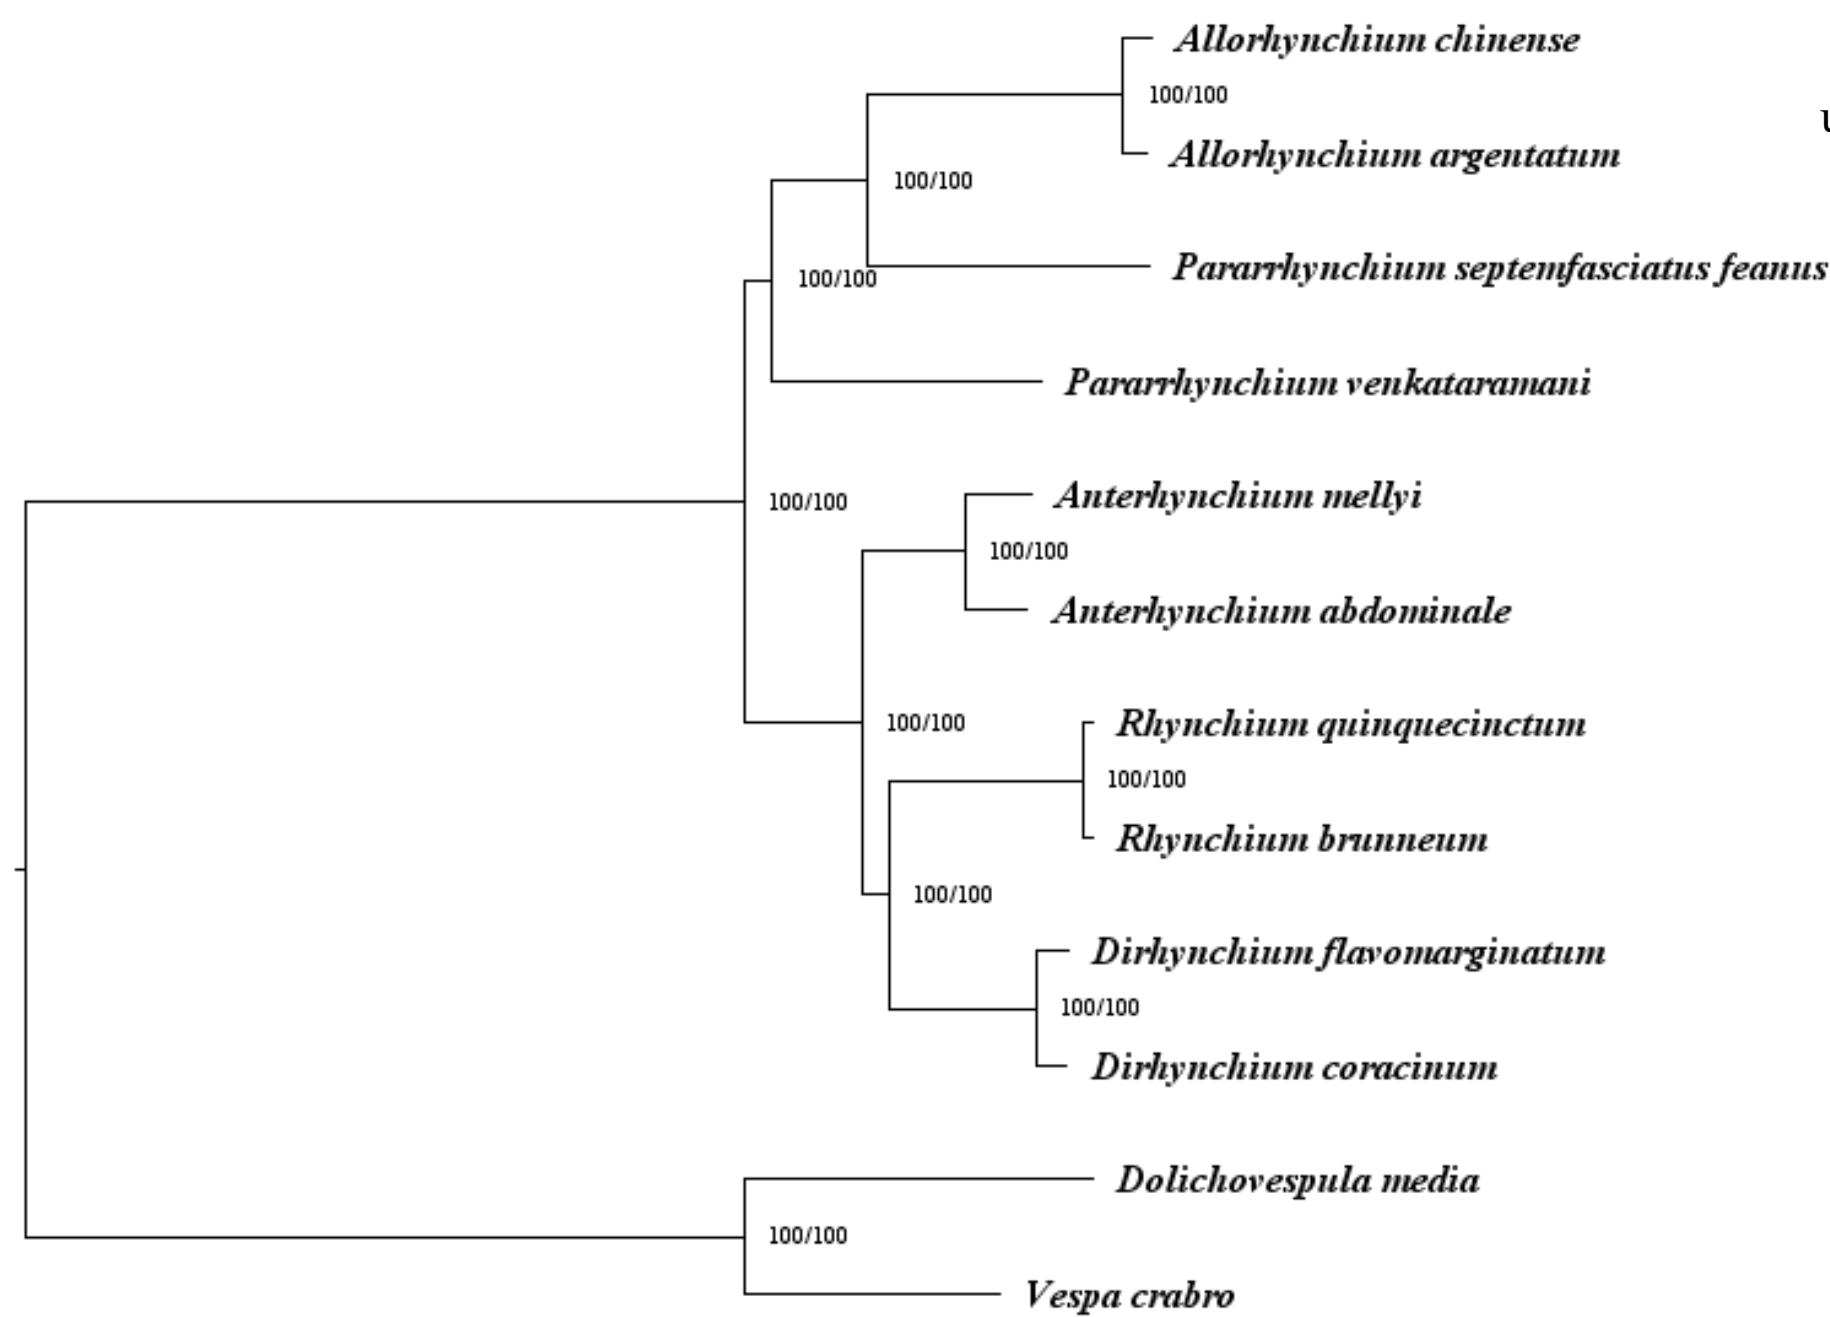

0.02



usco100\_partitioning

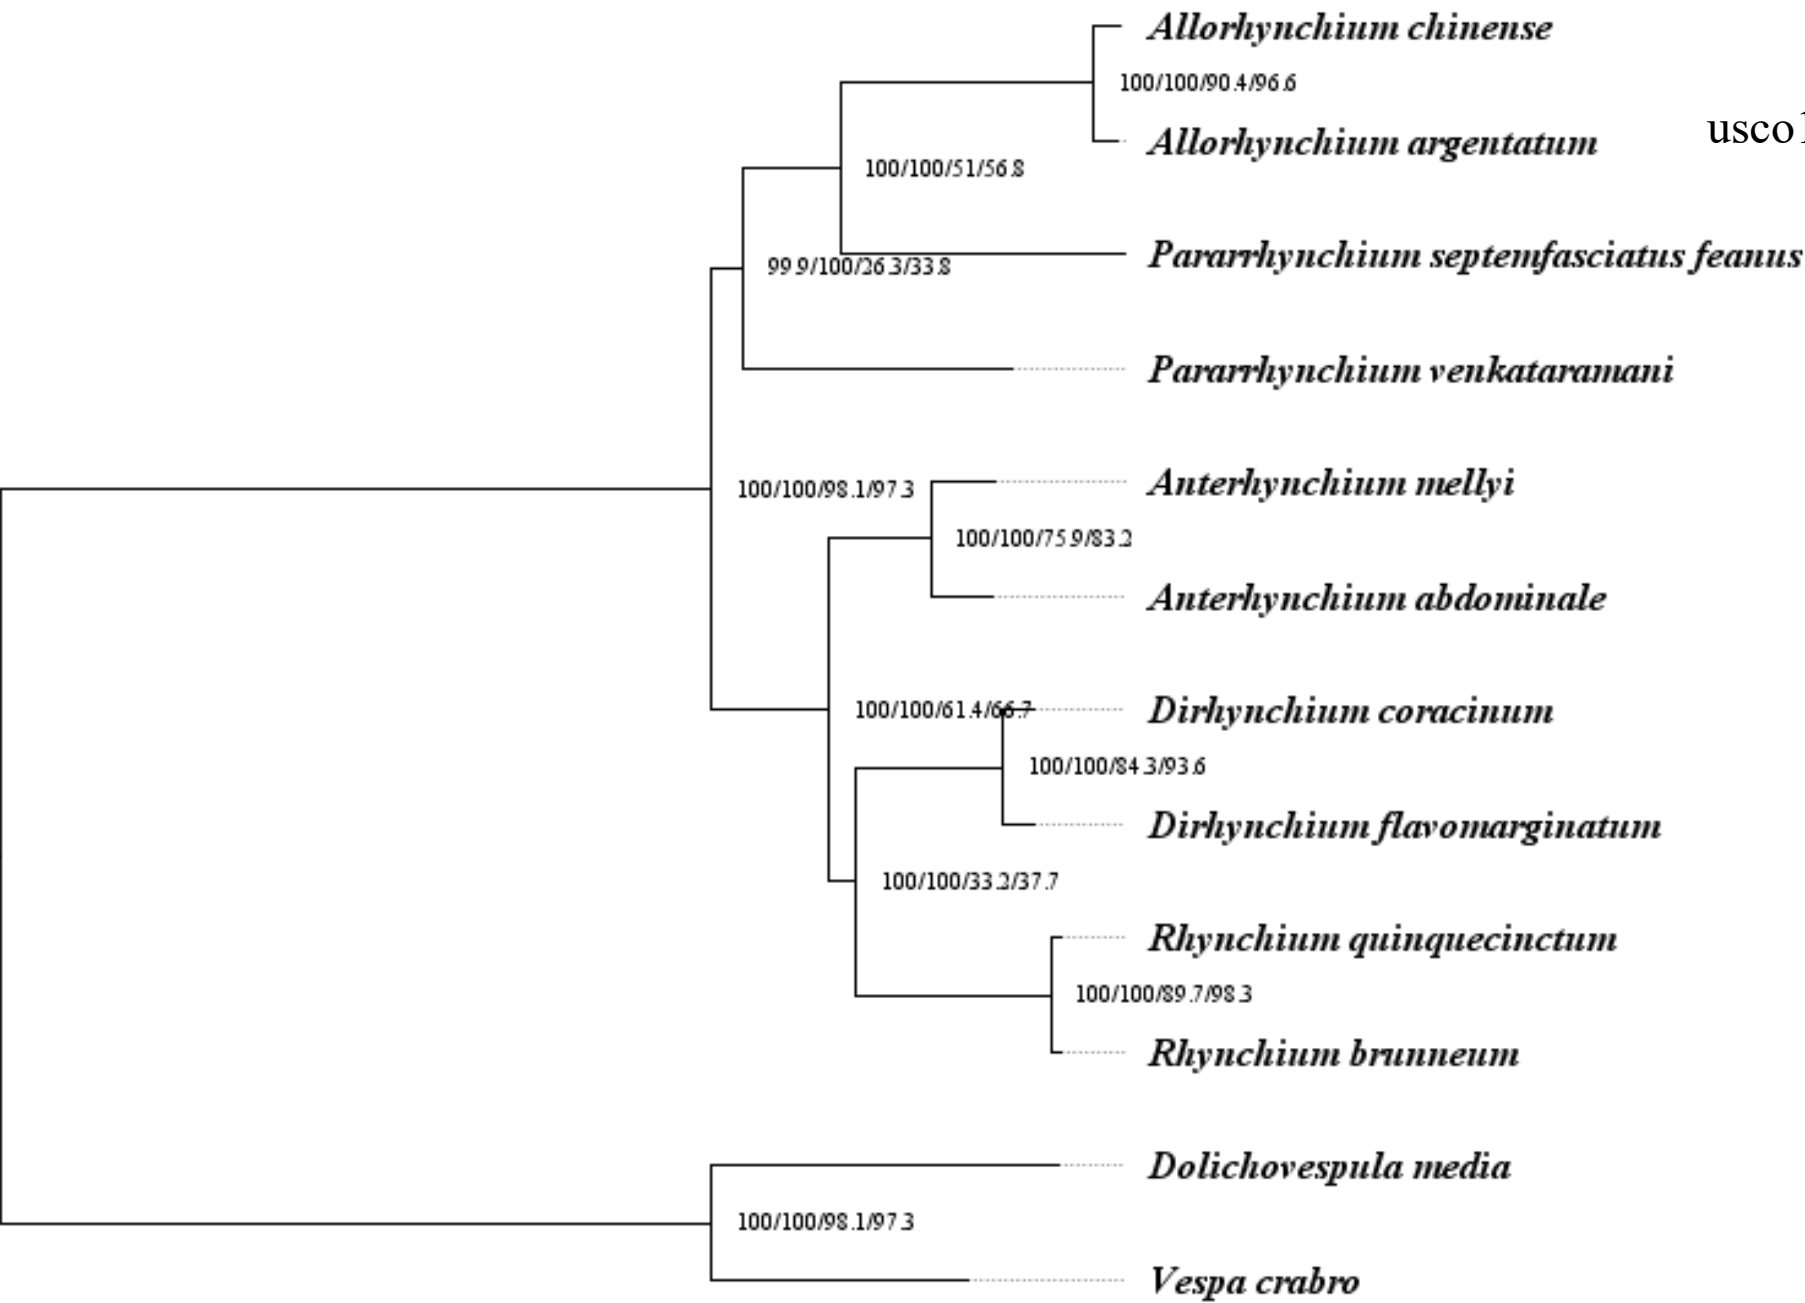

0.03

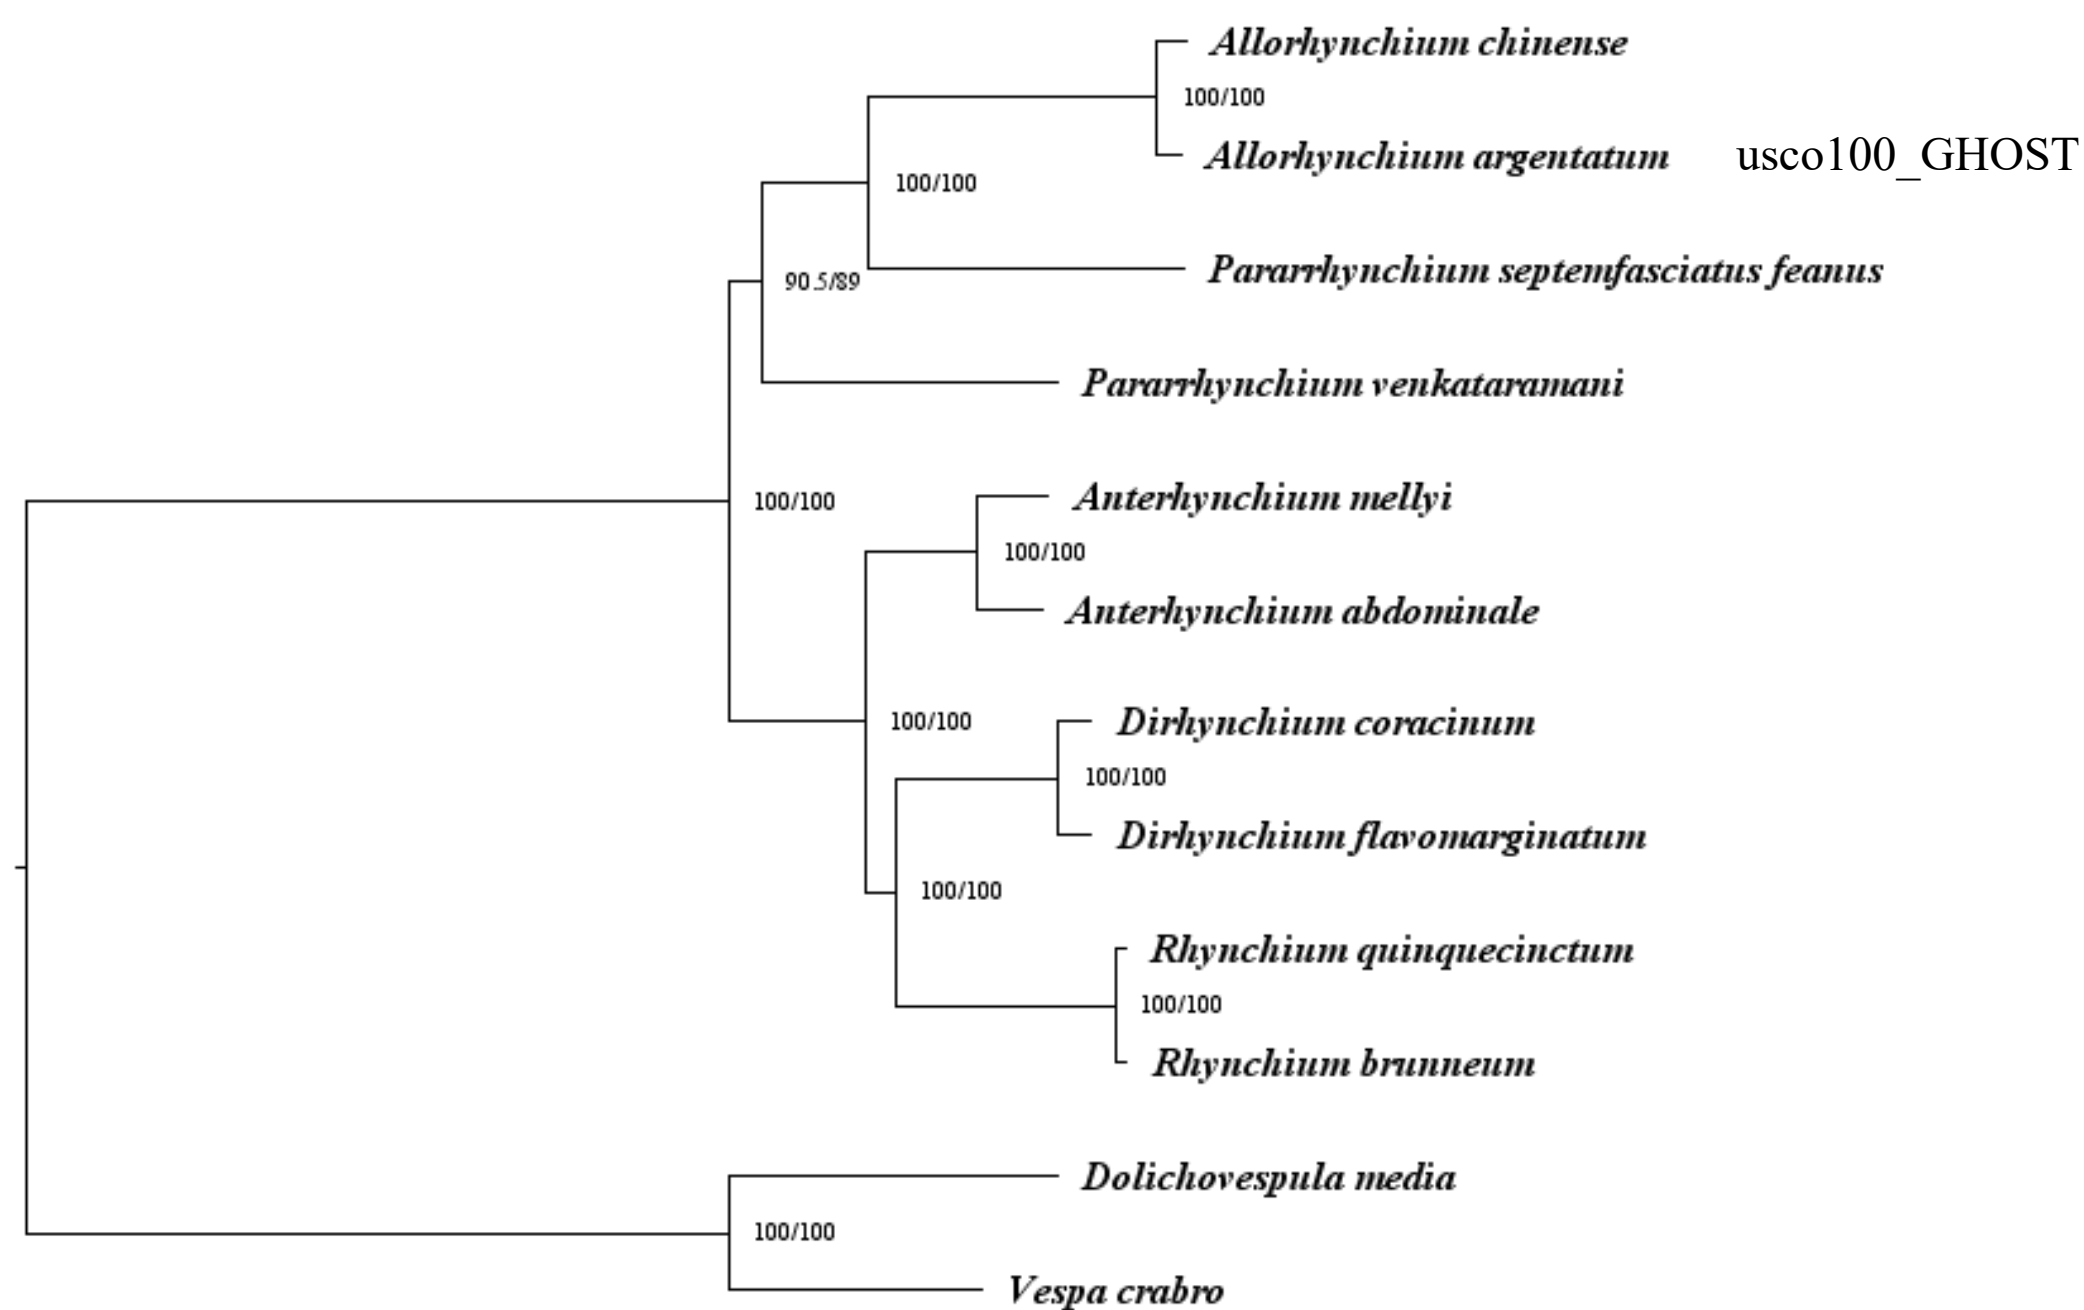

0.02

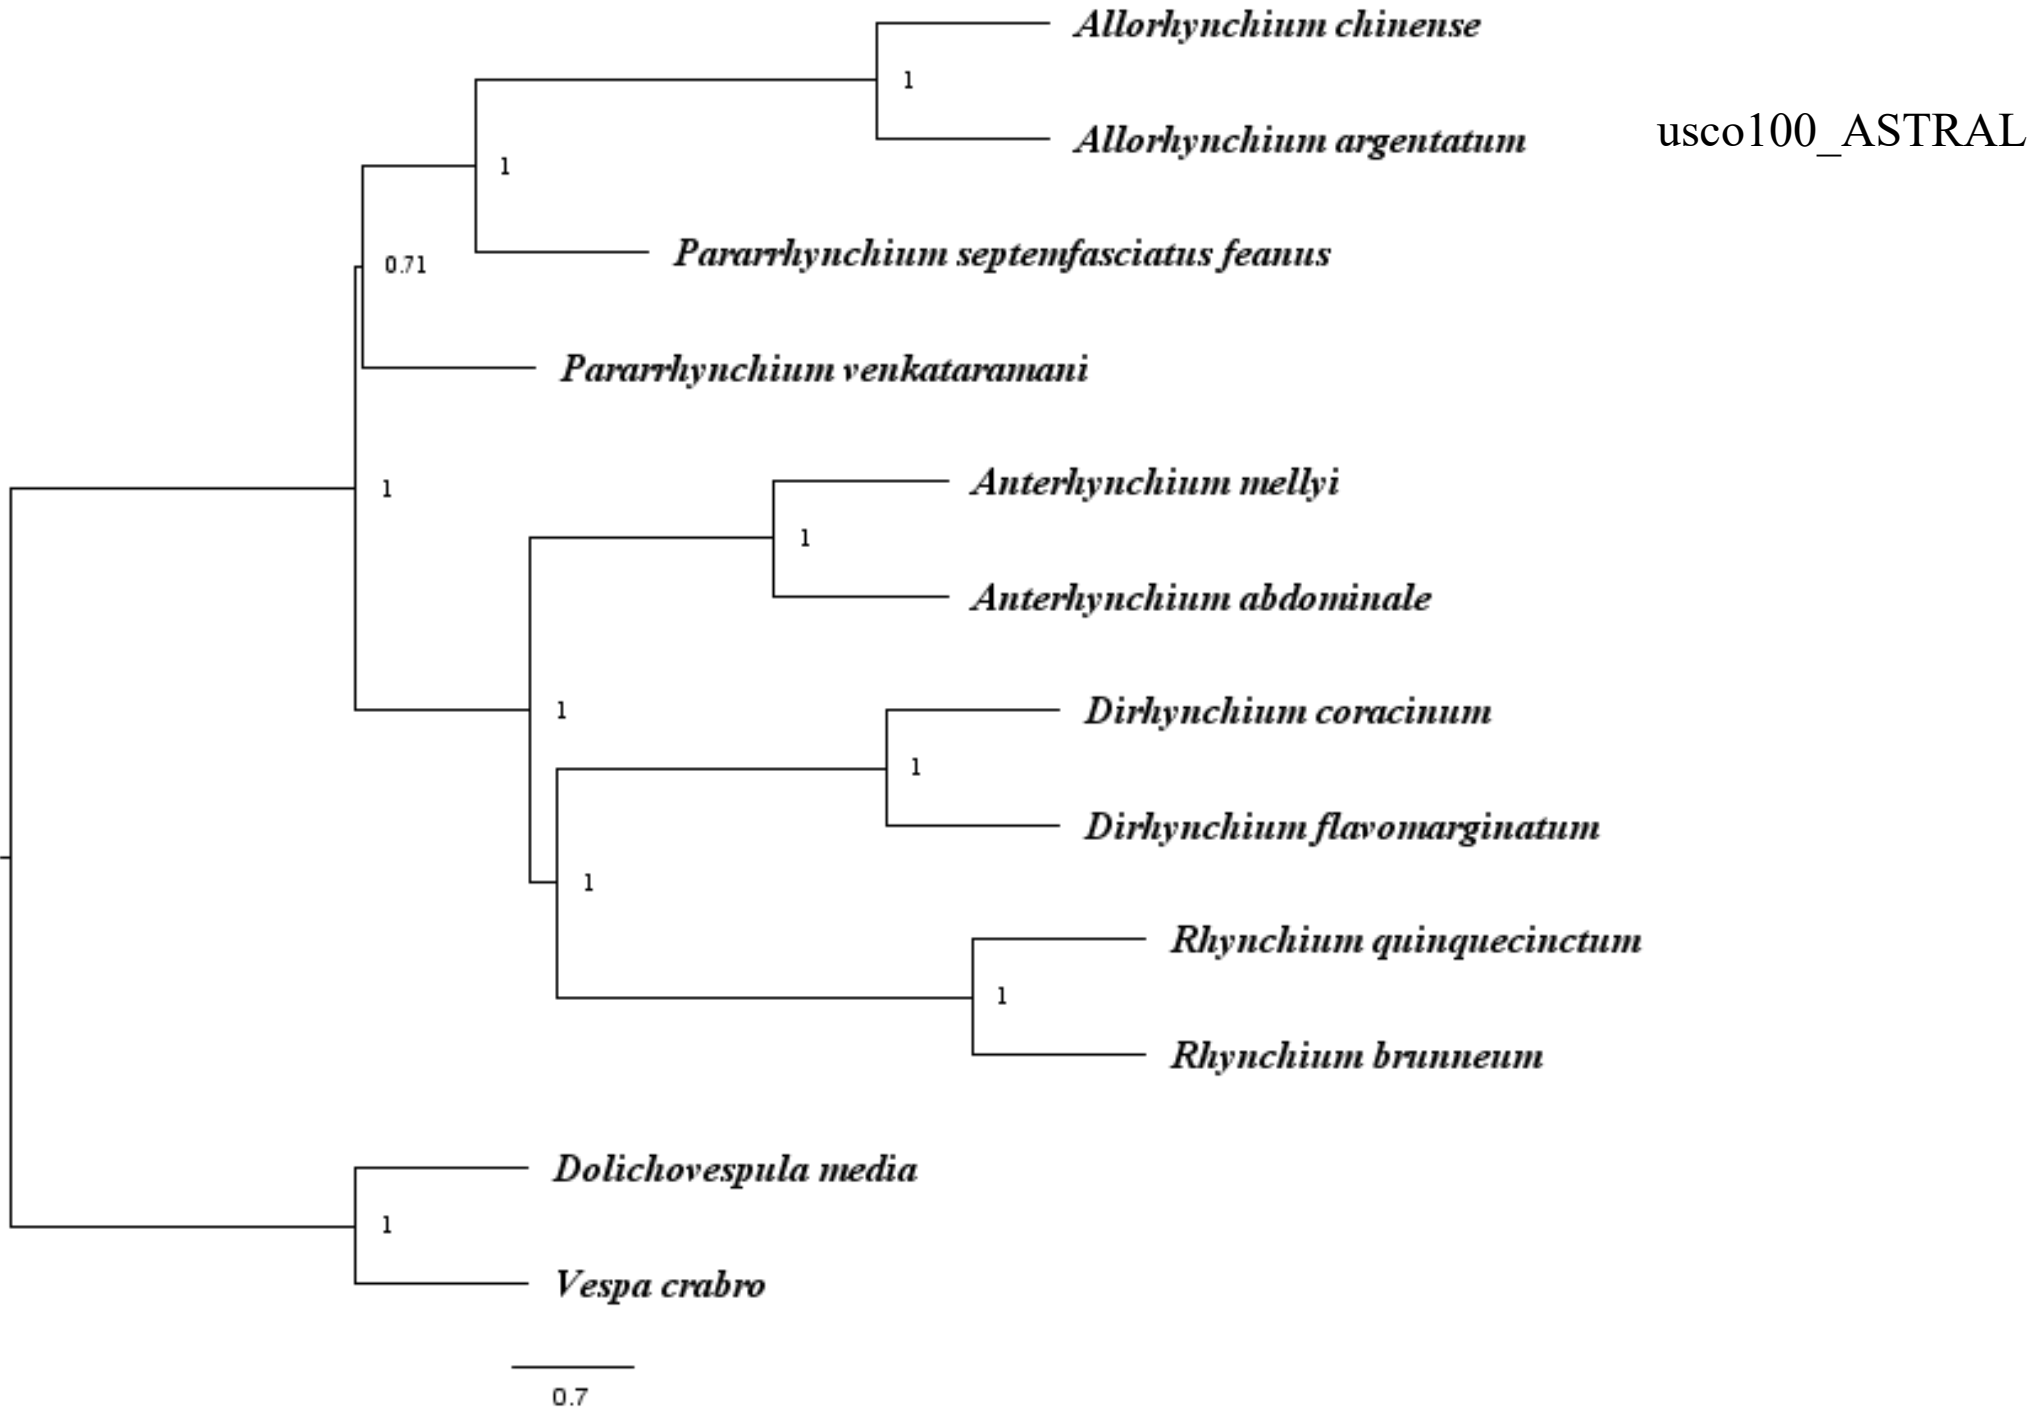

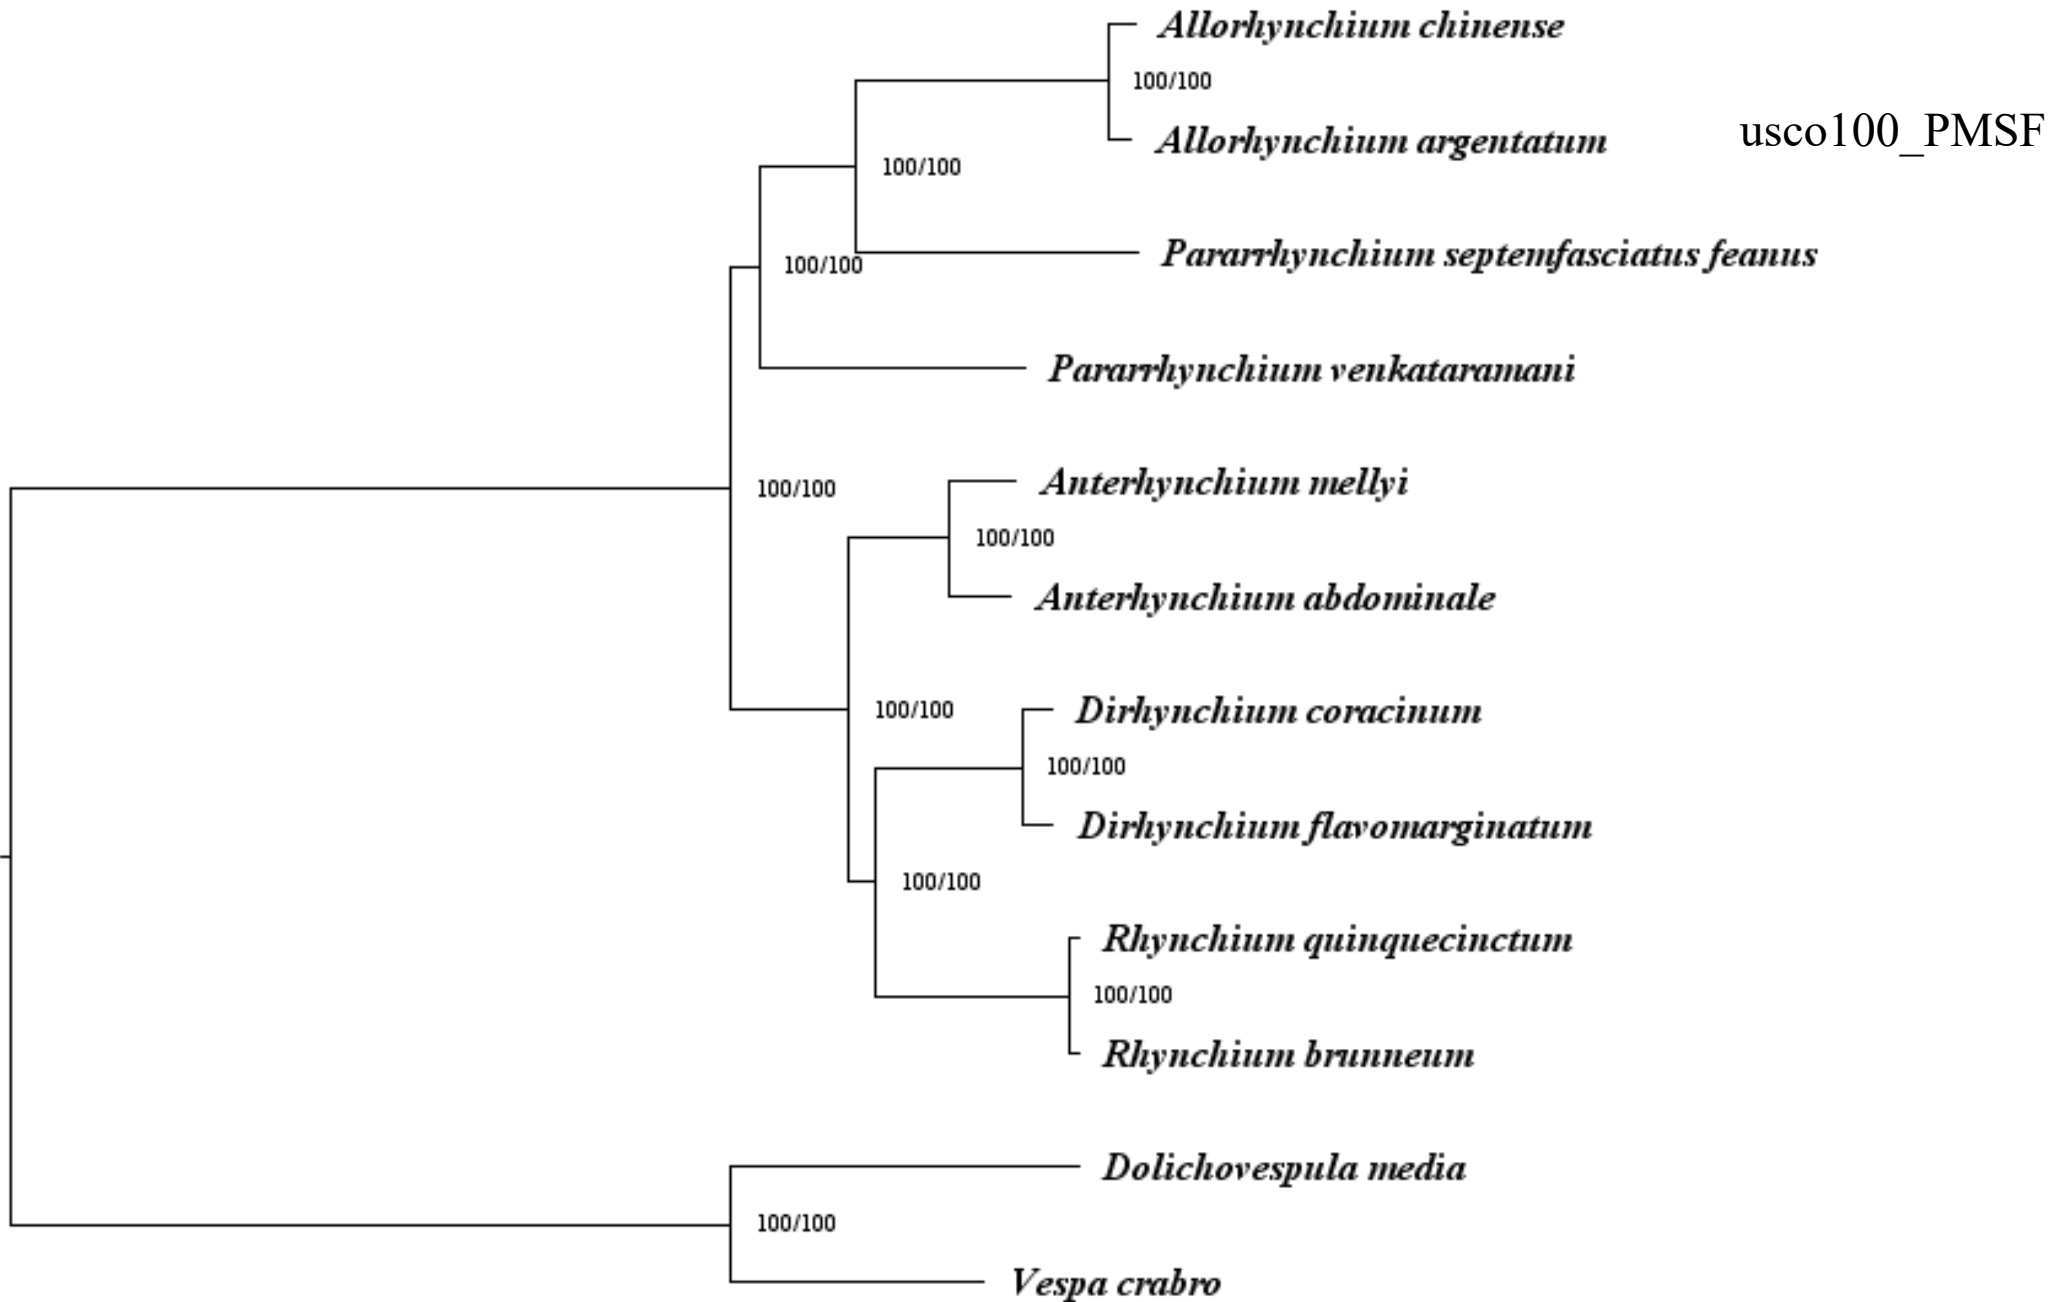

0.02

uce60\_partitioning

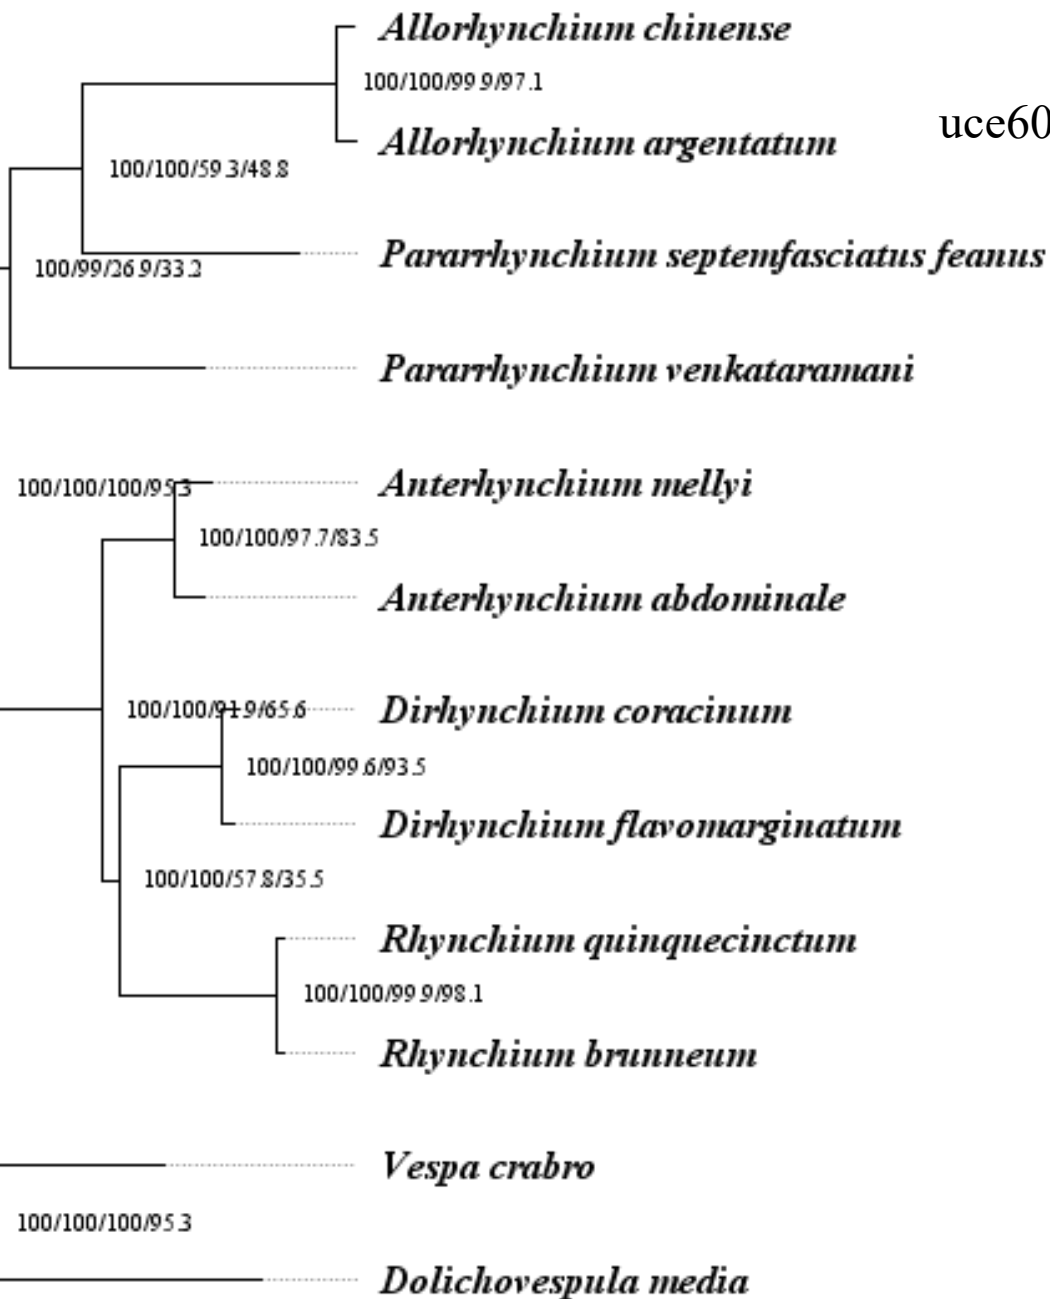

0.06

uce60\_GHOST

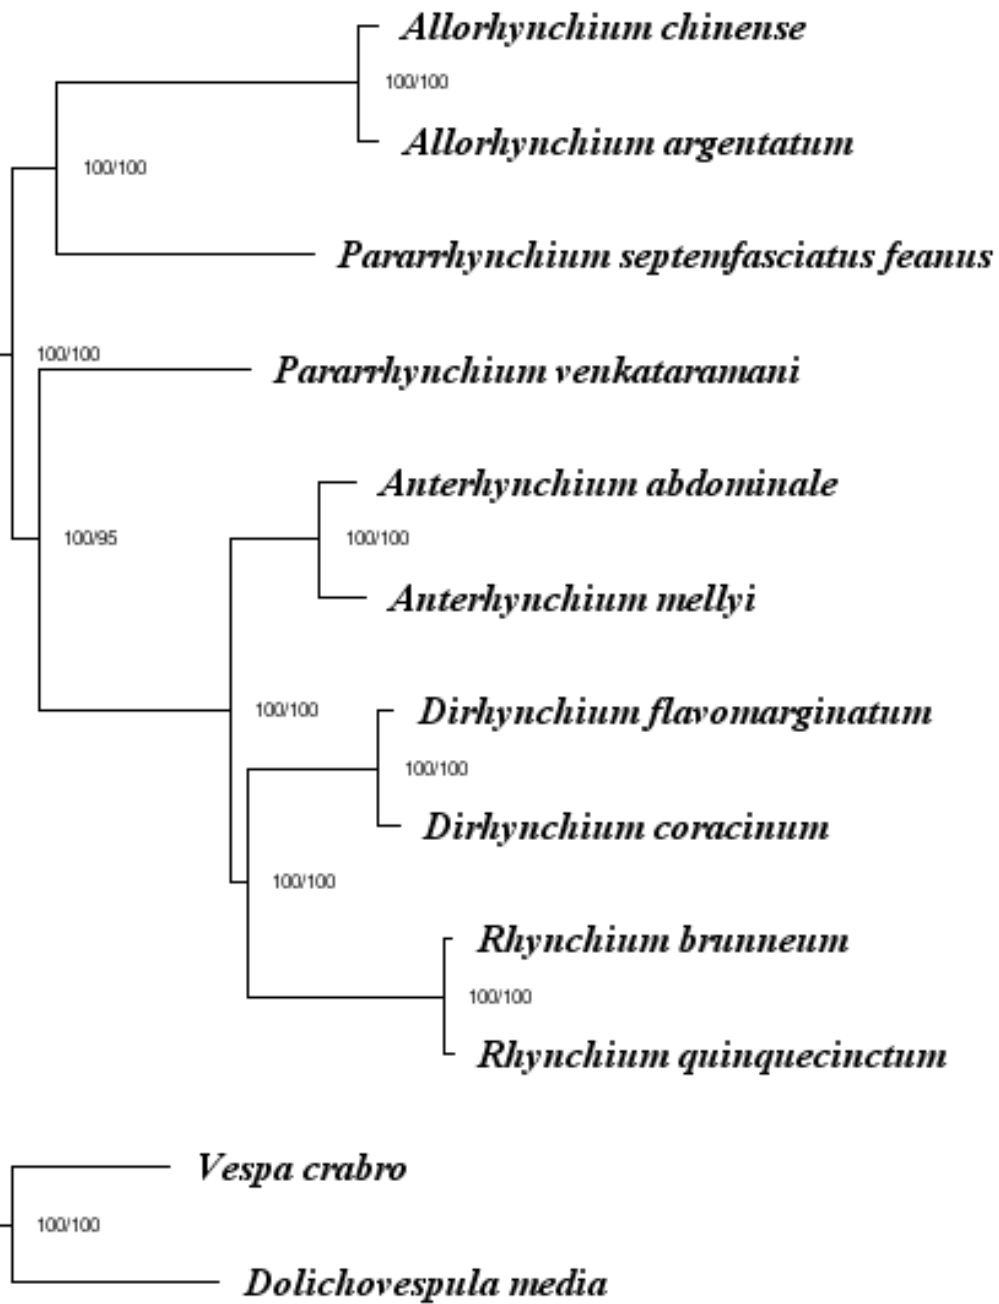

0.1

uce60\_ASTRAL

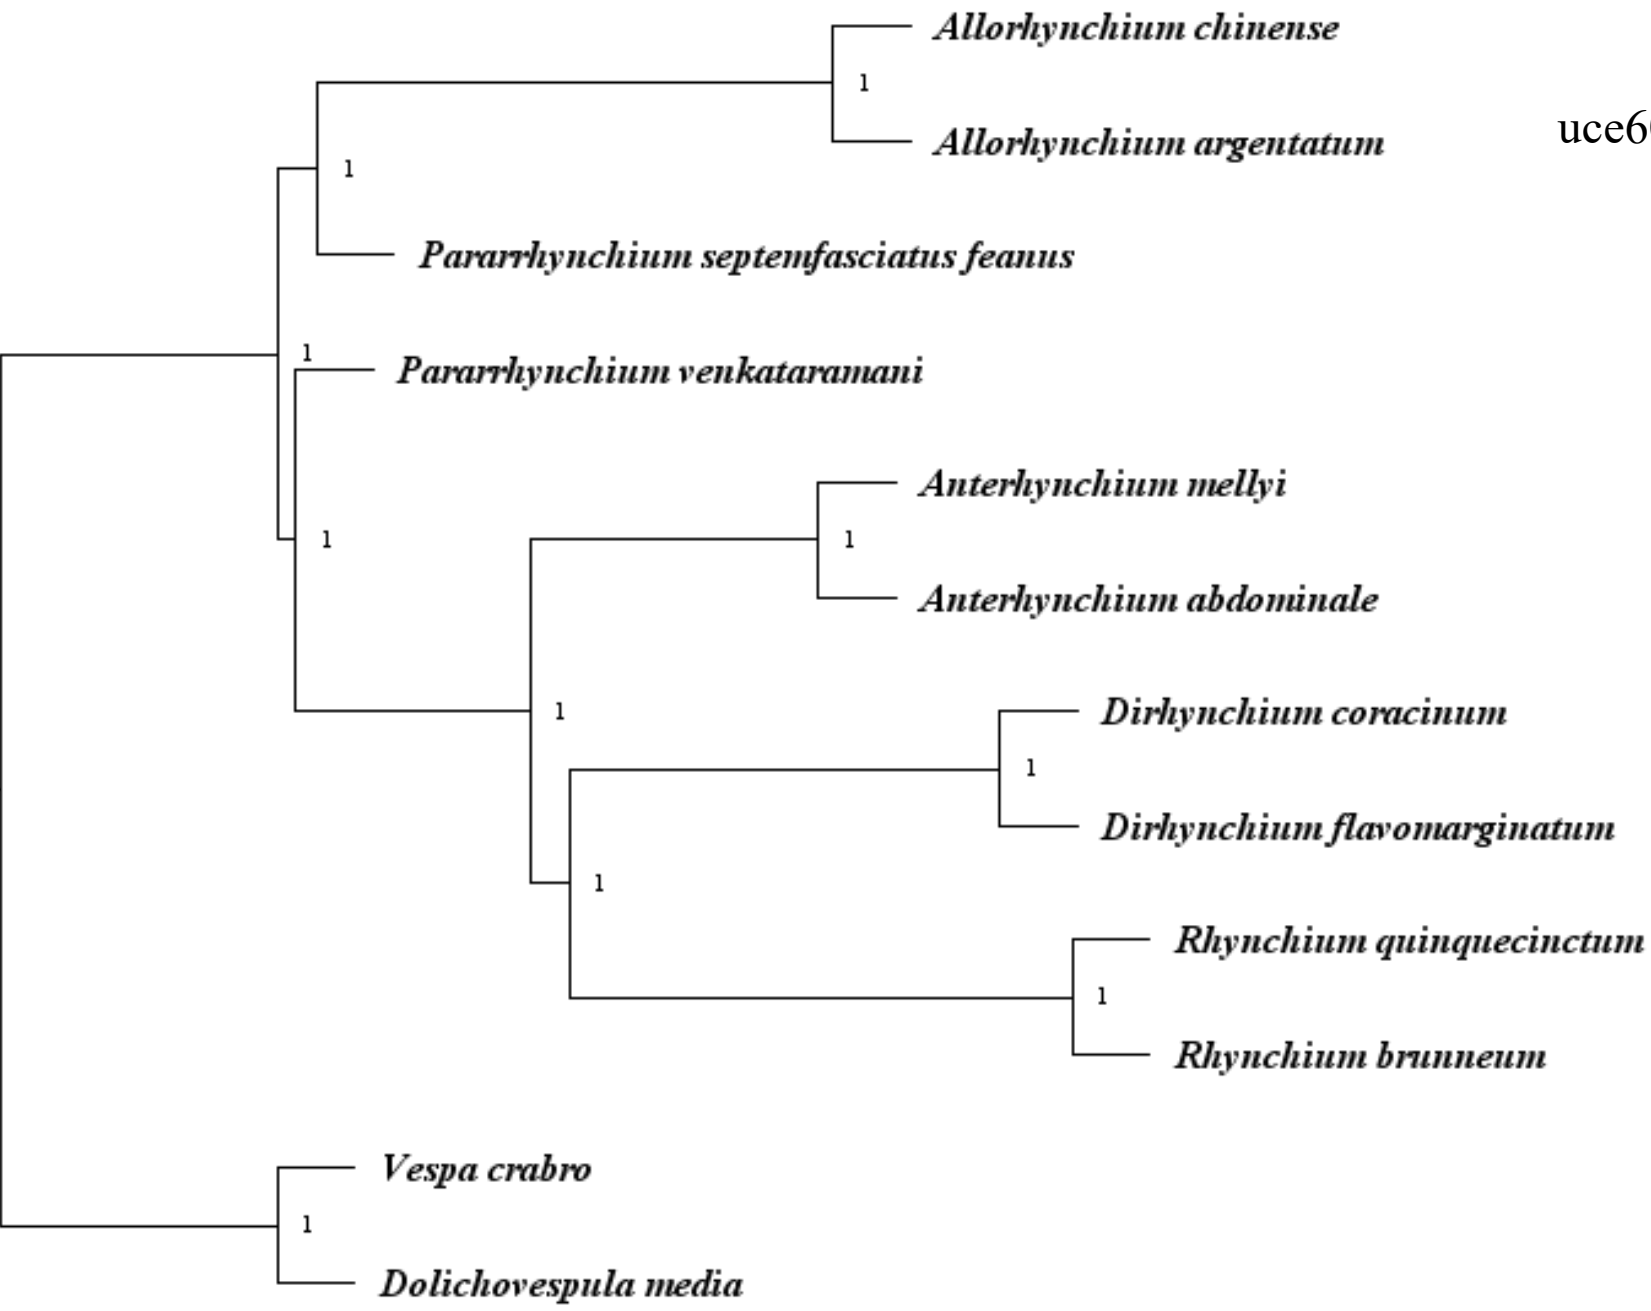

2.0

uce90\_partitioning

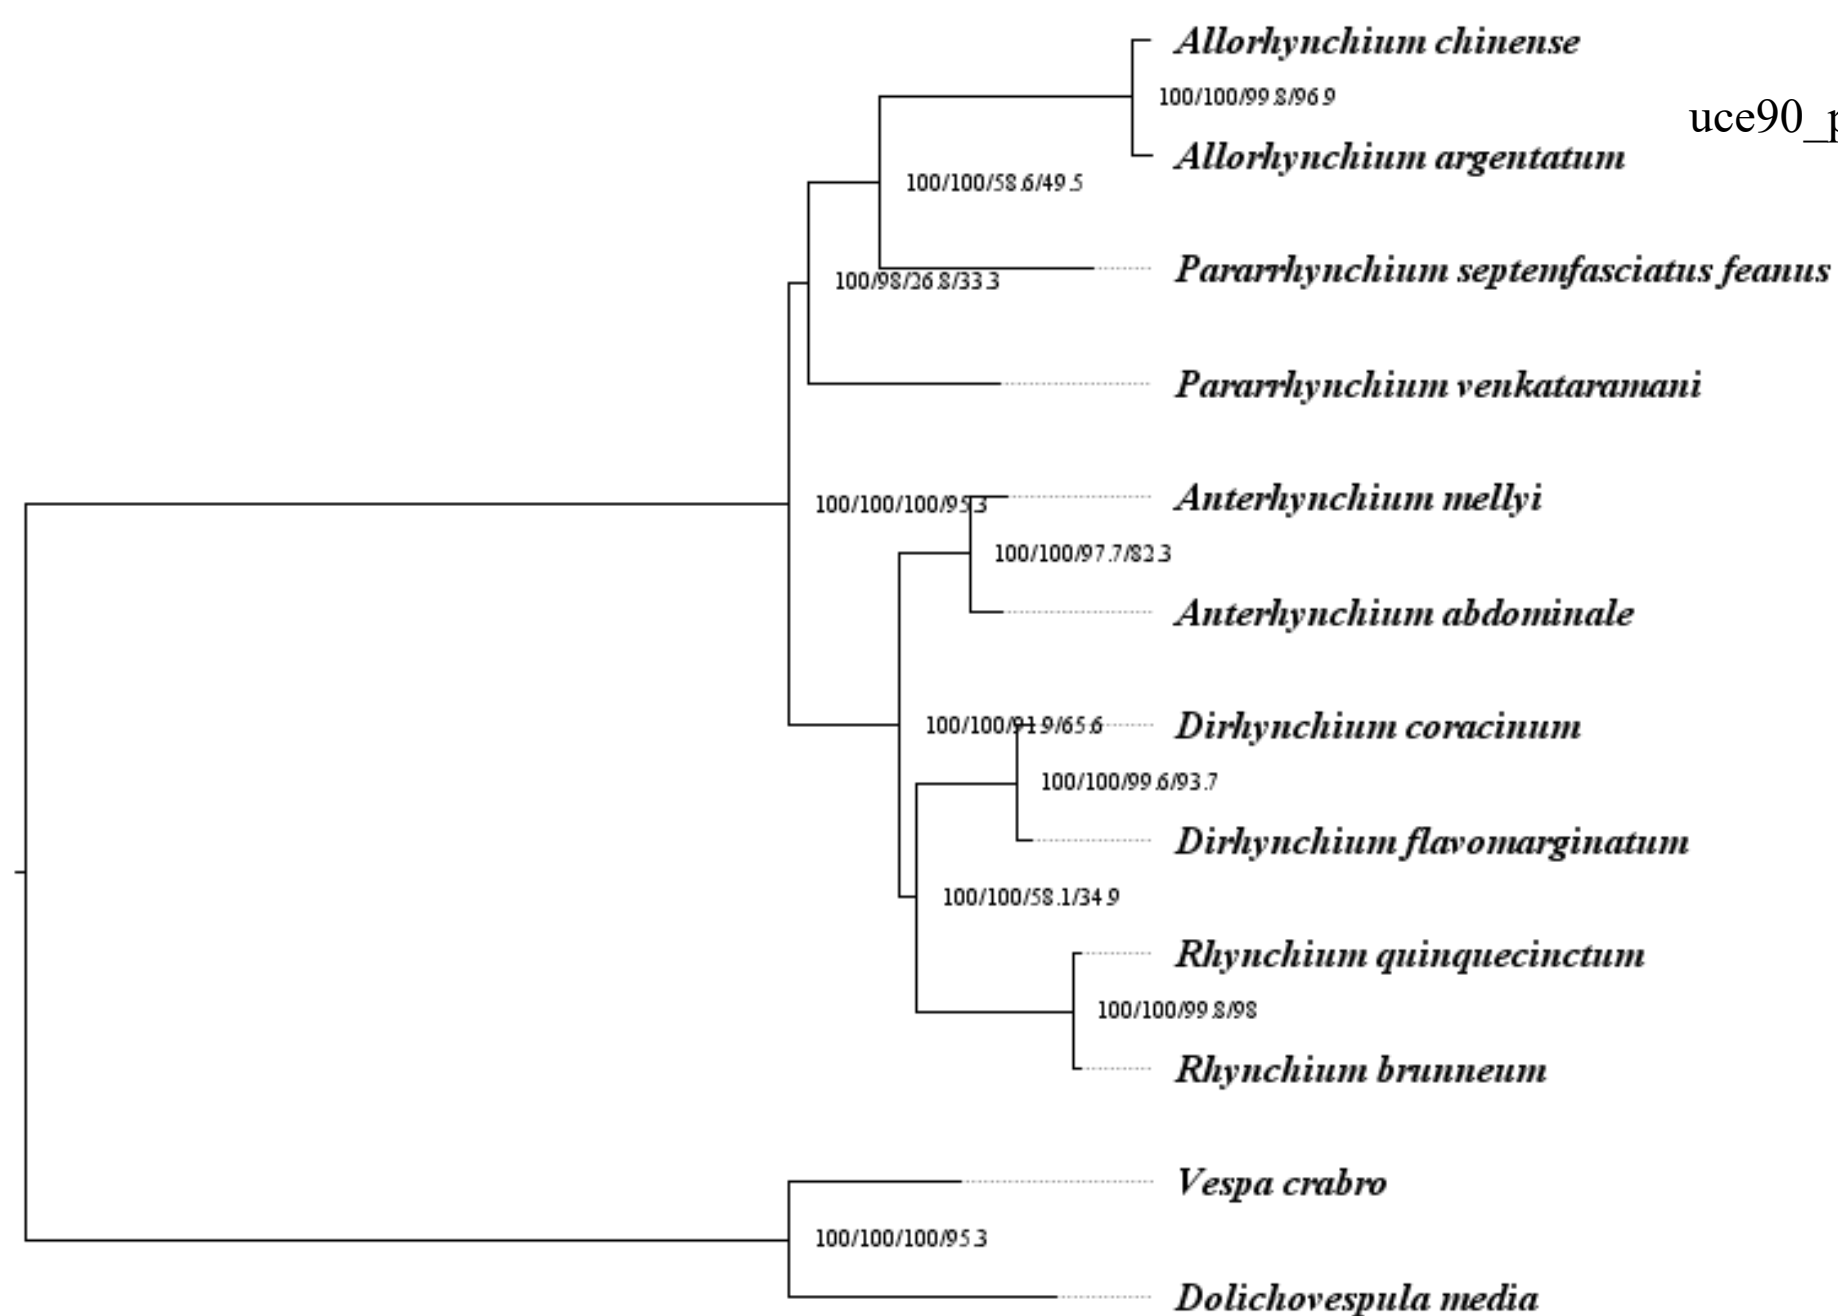

0.06



uce90\_GHOST

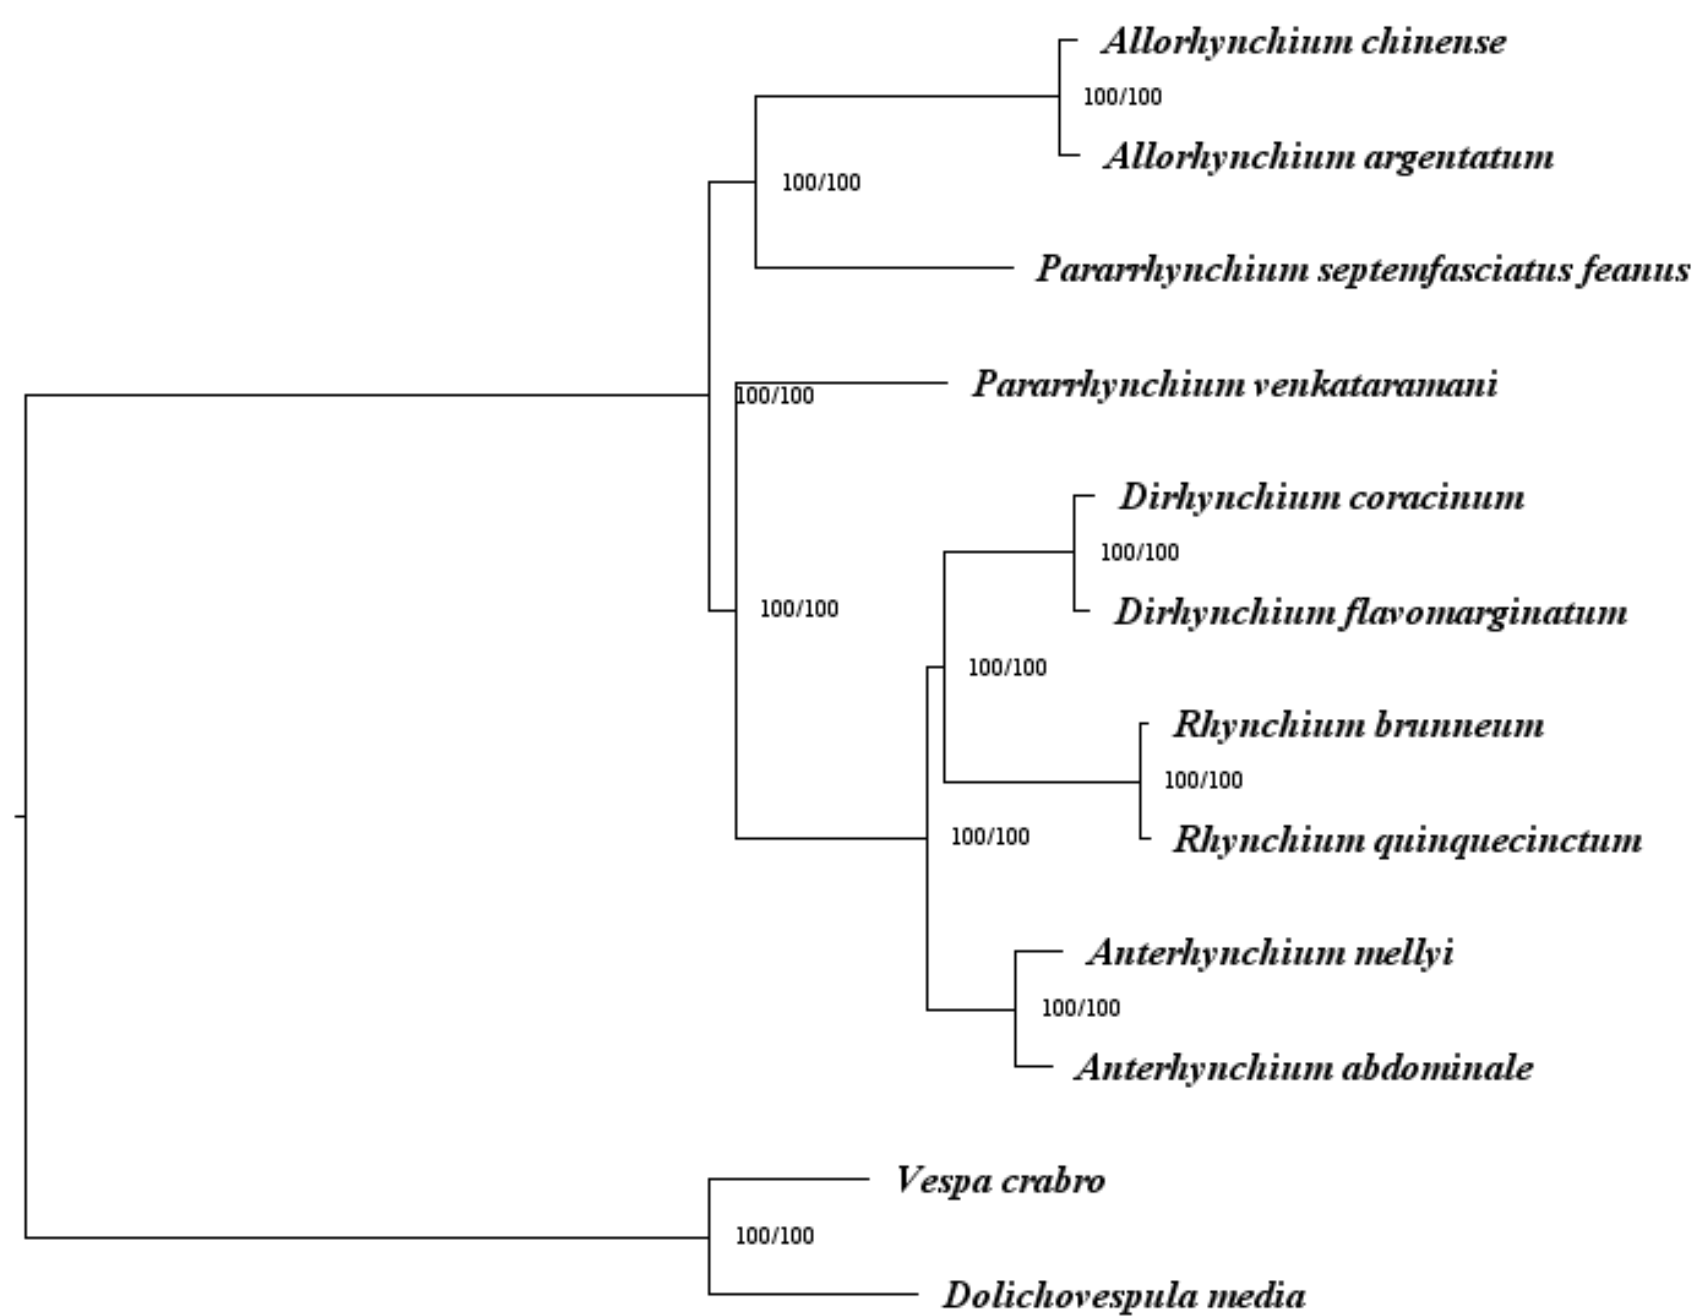

0.1

uce90\_ASTRAL

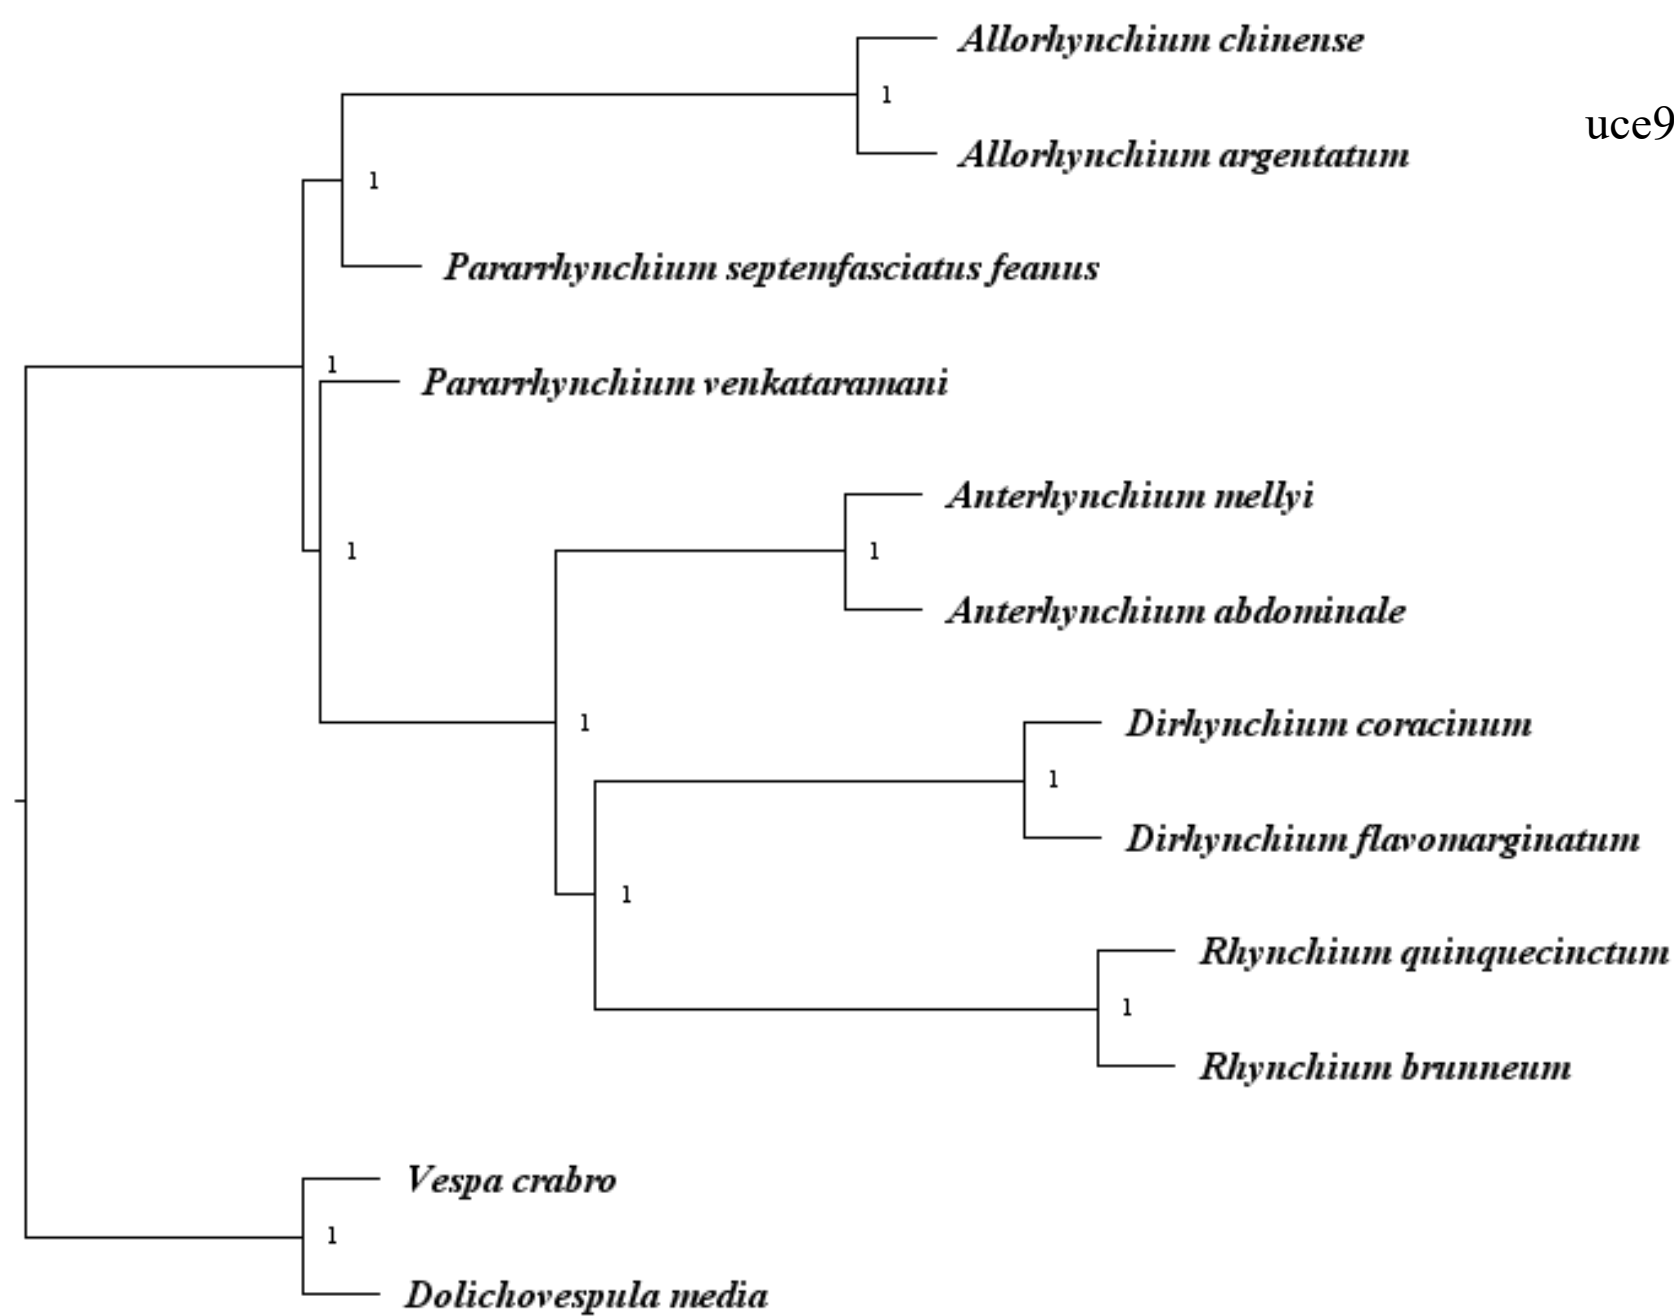

2.0

uce100\_partitioning

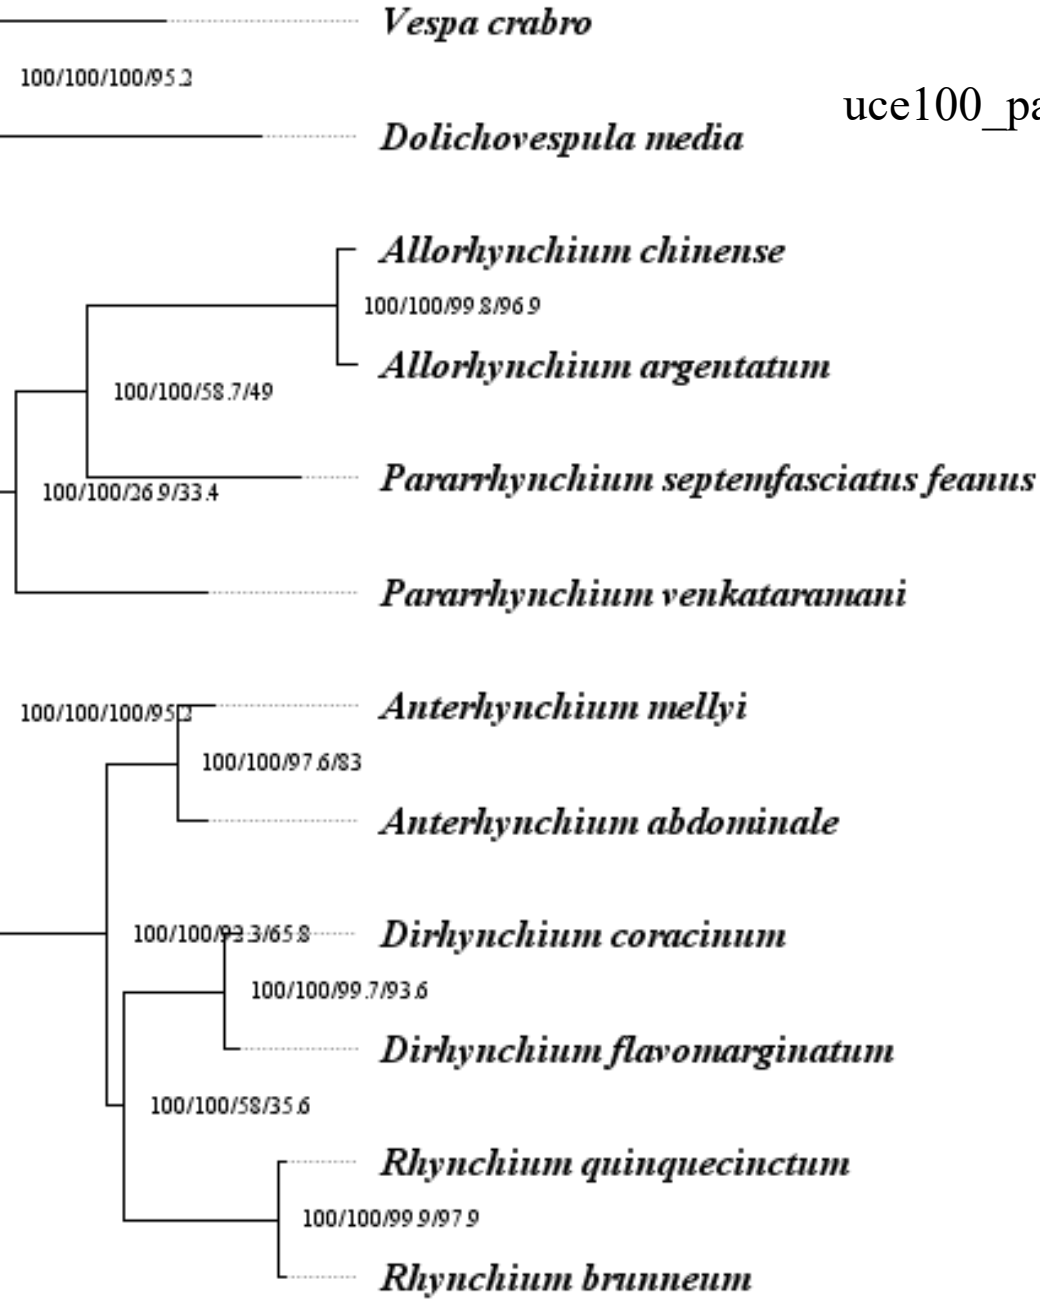

0.05

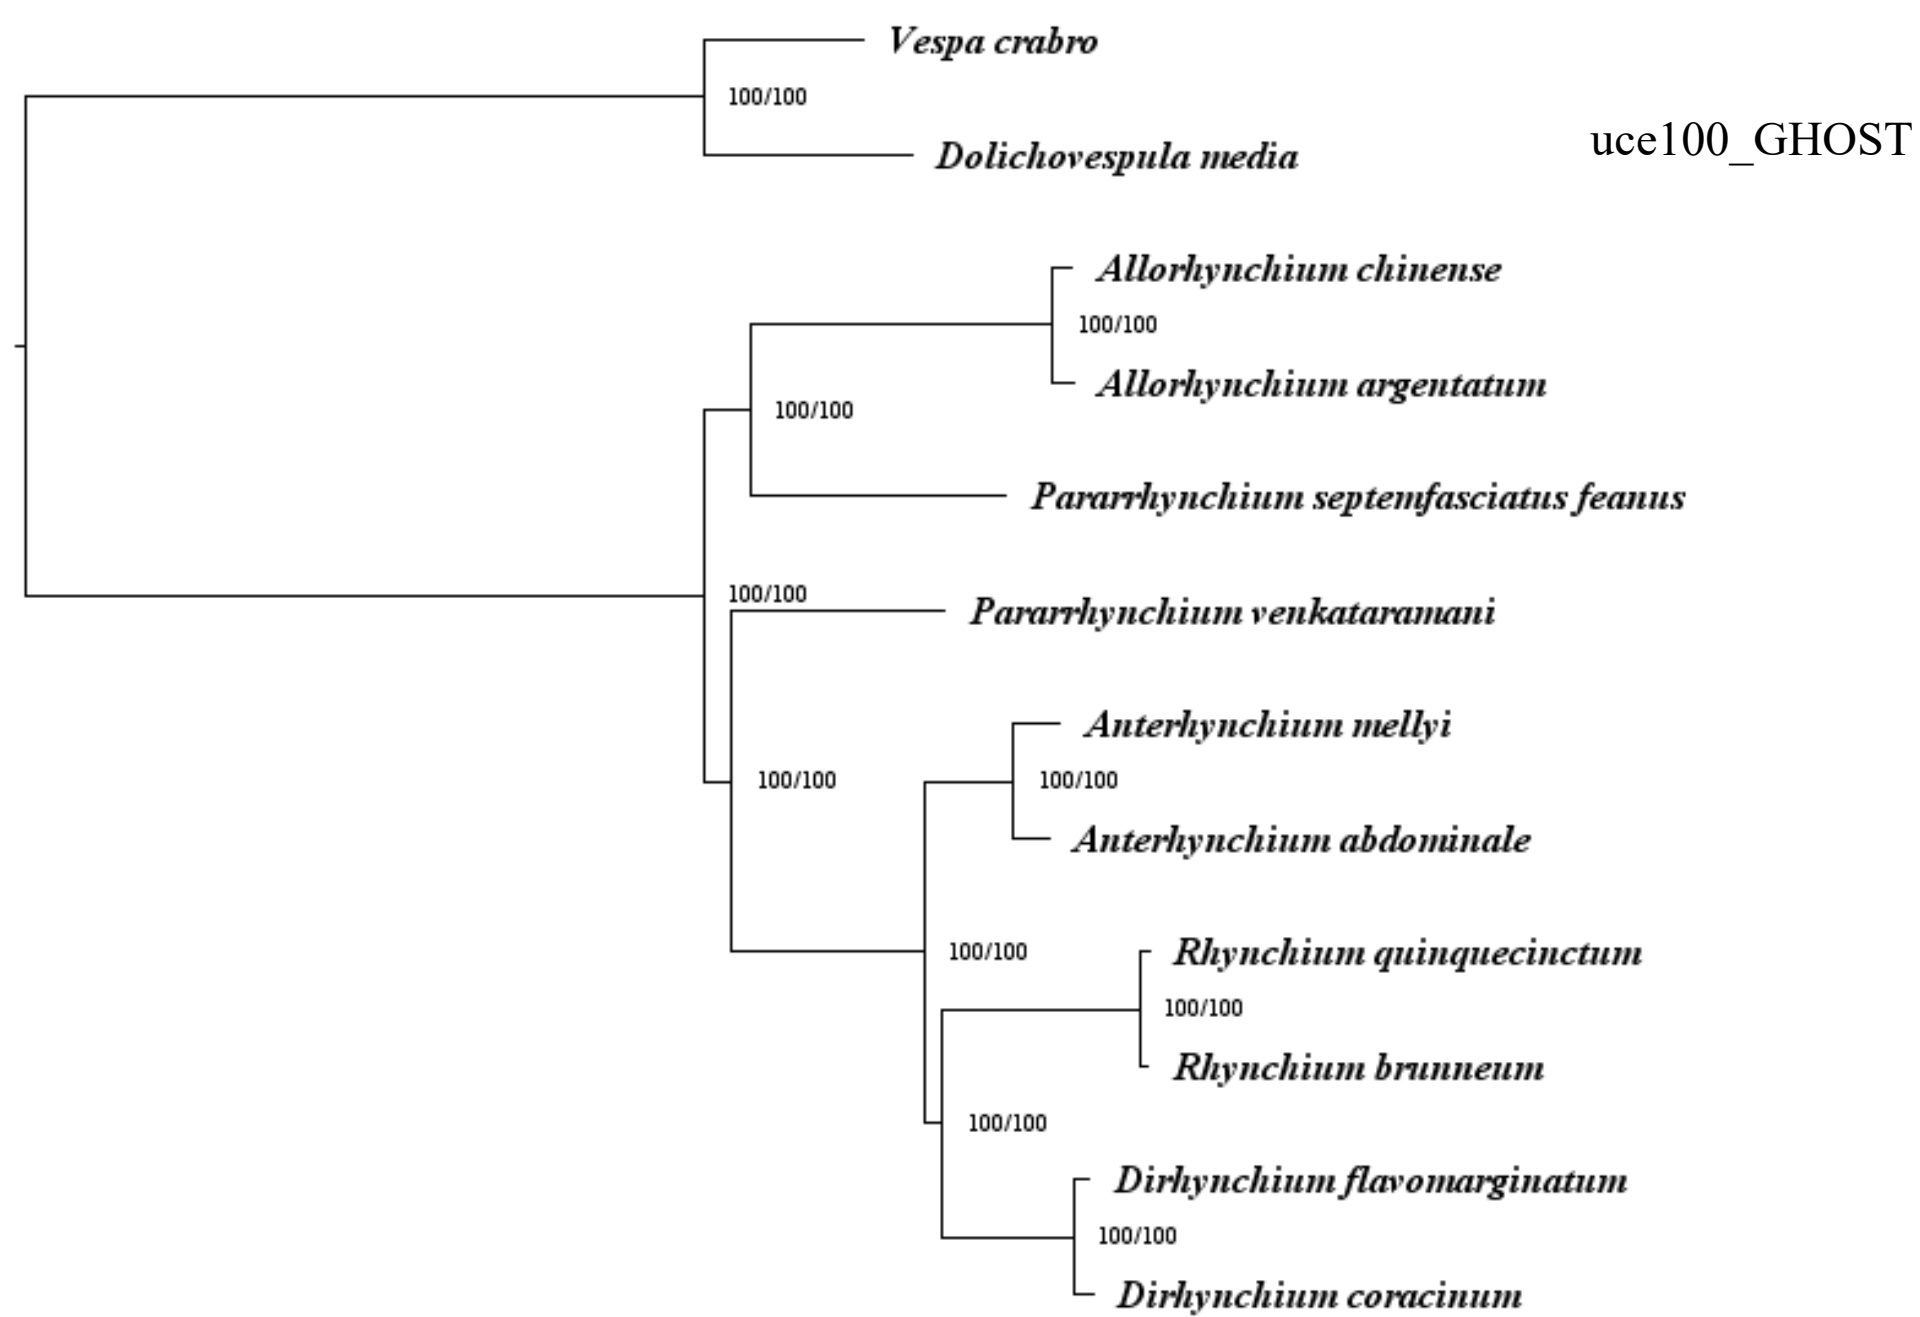

uce100\_GHOST

0.09

uce100\_ASTRAL

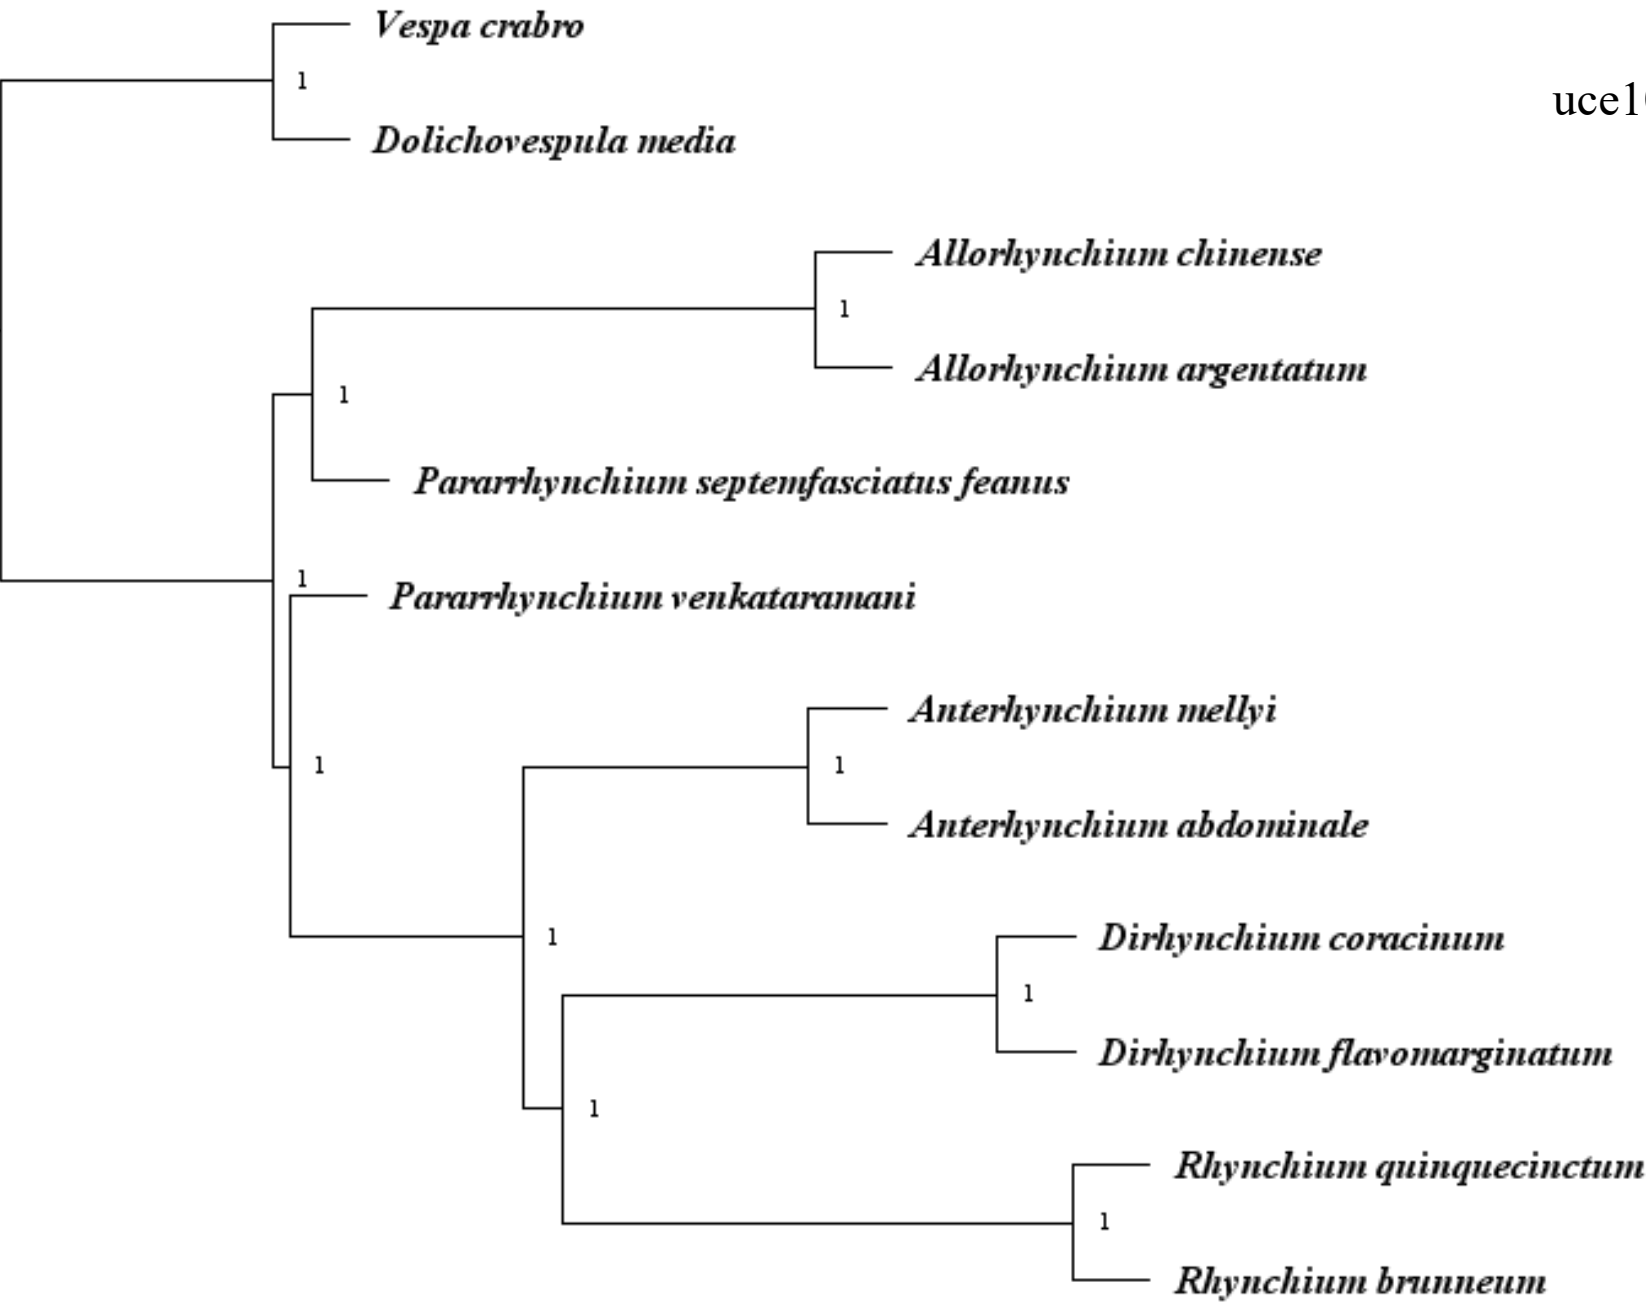

2.0
